# Supplementary material for: Microarray Based Functional Analysis of Myricetin and Proteomic Study on Its Anti-Inflammatory Property
Source: Biomed Res Int. 2019 Mar 7;2019:3746326. doi: 10.1155/2019/3746326 (PMC6431437; doi:10.1155/2019/3746326)
Supplement: Supplementary Materials — Supplementary Table 1: the disturbed genes involved in signal transduction. Supplementary Table 2: the disturbed genes involved in nucleus and mitochondrion. Supplementary Table 3: the disturbed genes involved in DNA binding, protein binding, kinase, and protein kinase activity. [file 3746326.f1.xlsx]

## Sheet: Sheet1
Supplementary table 1 The significantly changed genes involved in signal transduction
GO number :	0007165	Percentage of the total number of genes :			0.0727
Gene Symbol	Gene Title	Fold change([Myr] vs [CTL])	Regulation ([Myr] vs [CTL])	GO(Avadis)	Probe Set ID	Unigene (Avadis)	Entrez Gene	Representative Public ID
F2RL2	coagulation factor II (thrombin) receptor-like 2	7.65251	up	GO:0007165|GO:0007186|GO:0007596|GO:0007596|GO:0009611|GO:0009611|GO:0005886|GO:0005886|GO:0005887|GO:0016020|GO:0016021|GO:0001584|GO:0004435|GO:0004871|GO:0004872|GO:0004930|GO:0015057|GO:0015057	230147_at	Hs.42502	2151	AI378647
IGFBP1	insulin-like growth factor binding protein 1	5.06414	up	GO:0001558|GO:0007165|GO:0005576|GO:0005615|GO:0005520|GO:0005520|GO:0019838	205302_at	Hs.642938	3484	NM_000596
ARHGAP26	Rho GTPase activating protein 26	4.57794	down	GO:0007165|GO:0007399|GO:0030036|GO:0005622|GO:0005096|GO:0005100|GO:0005515	226576_at	Hs.654668	23092	AI768563
PDE11A	phosphodiesterase 11A	4.2674	down	GO:0007165|GO:0007165|GO:0005737|GO:0003824|GO:0004112|GO:0004114|GO:0004114|GO:0016787|GO:0046872|GO:0047555	224224_s_at	Hs.570273	50940	AB038041
ADM	adrenomedullin	3.3674	up	GO:0006171|GO:0006701|GO:0007165|GO:0007267|GO:0007507|GO:0007565|GO:0007588|GO:0008015|GO:0008284|GO:0009611|GO:0045906|GO:0005576|GO:0005615|GO:0005625|GO:0005737|GO:0005102|GO:0005179	202912_at	Hs.441047	133	NM_001124
GABBR1 /// UBD	gamma-aminobutyric acid (GABA) B receptor, 1 /// ubiquitin D	3.23964	down	GO:0006464|GO:0006464|GO:0006508|GO:0006512|GO:0007165|GO:0007186|GO:0007194|GO:0007214|GO:0005576|GO:0005886|GO:0005887|GO:0016020|GO:0016021|GO:0030054|GO:0045202|GO:0045211|GO:0004871|GO:0004872|GO:0004930|GO:0004965|GO:0004965|GO:0008067	205890_s_at	Hs.44532	10537 /// 2550	NM_006398
ITPR2	inositol 1,4,5-triphosphate receptor, type 2	2.96024	down	GO:0006810|GO:0006810|GO:0006811|GO:0006816|GO:0007165|GO:0005783|GO:0005783|GO:0005789|GO:0005886|GO:0016020|GO:0016021|GO:0004872|GO:0005216|GO:0005220|GO:0005262|GO:0005509|GO:0008095|GO:0015085	202661_at	Hs.512235	3709	AI963873
ITPR2	inositol 1,4,5-triphosphate receptor, type 2	2.82618	down	GO:0006810|GO:0006810|GO:0006811|GO:0006816|GO:0007165|GO:0005783|GO:0005783|GO:0005789|GO:0005886|GO:0016020|GO:0016021|GO:0004872|GO:0005216|GO:0005220|GO:0005262|GO:0005509|GO:0008095|GO:0015085	202660_at	Hs.512235	3709	AA834576
FLJ21767 /// LOC100132214 /// LOC100133005 /// LOC100134722 /// RASA4	RAS p21 protein activator 4 /// hypothetical protein FLJ21767 /// similar to HSPC047 protein /// similar to RAS p21 protein activator 4	2.72599	down	GO:0007165|GO:0007242|GO:0051056|GO:0005622|GO:0005737|GO:0005886|GO:0016020|GO:0005096|GO:0005096|GO:0008270|GO:0046872	212706_at	Hs.670011	100132214 /// 100133005 /// 100134722 /// 10156 /// 401331	AB011110
RHBDL2	rhomboid, veinlet-like 2 (Drosophila)	2.67948	down	GO:0007165|GO:0016020|GO:0016021|GO:0004252|GO:0008233|GO:0016787	1552502_s_at	Hs.524626	54933	NM_017821
PLXNC1	plexin C1	2.66755	down	GO:0007155|GO:0007165|GO:0007275|GO:0005622|GO:0005886|GO:0016020|GO:0016021|GO:0004872|GO:0005102	213241_at	Hs.584845	10154	AF035307
SOS1	son of sevenless homolog 1 (Drosophila)	2.65005	down	GO:0007165|GO:0007264|GO:0007265|GO:0035023|GO:0051056|GO:0005622|GO:0003677|GO:0005085|GO:0005088|GO:0005089|GO:0005089|GO:0005100|GO:0005515	227426_at	Hs.709893	6654	AV702692
NF1	neurofibromin 1 (neurofibromatosis, von Recklinghausen disease, Watson disease)	2.63889	up	GO:0000165|GO:0001649|GO:0001656|GO:0001666|GO:0001889|GO:0001937|GO:0001952|GO:0006469|GO:0007049|GO:0007154|GO:0007165|GO:0007265|GO:0007406|GO:0007420|GO:0007422|GO:0007507|GO:0008542|GO:0014044|GO:0014065|GO:0021510|GO:0021897|GO:0021987|GO:0022011|GO:0030036|GO:0030198|GO:0030199|GO:0030325|GO:0030336|GO:0032318|GO:0032320|GO:0032320|GO:0042060|GO:0042992|GO:0043065|GO:0043407|GO:0043409|GO:…	210631_at	Hs.113577	4763	D42072
IPO8	importin 8	2.53581	down	GO:0000059|GO:0006810|GO:0006886|GO:0007165|GO:0015031|GO:0005634|GO:0005643|GO:0005737|GO:0005488|GO:0008536|GO:0008565	225528_at	Hs.505136	10526	AU149465
F2RL1	coagulation factor II (thrombin) receptor-like 1	2.49566	up	GO:0007165|GO:0007186|GO:0007186|GO:0007204|GO:0007596|GO:0030193|GO:0005794|GO:0005886|GO:0005887|GO:0016020|GO:0016021|GO:0001584|GO:0004871|GO:0004872|GO:0004872|GO:0004930|GO:0004930|GO:0005102|GO:0008233|GO:0015057	213506_at	Hs.154299	2150	BE965369
STARD13	StAR-related lipid transfer (START) domain containing 13	2.49304	down	GO:0007049|GO:0007165|GO:0045786|GO:0005622|GO:0005737|GO:0005739|GO:0005811|GO:0012511|GO:0016020|GO:0005096|GO:0005515	213103_at	Hs.507704	90627	AA128023
NRP1	neuropilin 1	2.48792	down	GO:0001525|GO:0007155|GO:0007165|GO:0007267|GO:0007275|GO:0007399|GO:0007411|GO:0008284|GO:0009887|GO:0030154|GO:0005576|GO:0005624|GO:0005783|GO:0005886|GO:0016020|GO:0016021|GO:0004872|GO:0005021|GO:0005515	212298_at	Hs.131704	8829	BE620457
ITPR2	inositol 1,4,5-triphosphate receptor, type 2	2.48789	down	GO:0006810|GO:0006810|GO:0006811|GO:0006816|GO:0007165|GO:0005783|GO:0005783|GO:0005789|GO:0005886|GO:0016020|GO:0016021|GO:0004872|GO:0005216|GO:0005220|GO:0005262|GO:0005509|GO:0008095|GO:0015085	202662_s_at	Hs.512235	3709	NM_002223
RASSF4	Ras association (RalGDS/AF-6) domain family member 4	2.43854	down	GO:0007049|GO:0007165|GO:0045786|GO:0005515	226436_at	Hs.522895	83937	N49935
GPRC5A	G protein-coupled receptor, family C, group 5, member A	2.42505	up	GO:0007165|GO:0007165|GO:0007186|GO:0005886|GO:0005887|GO:0016020|GO:0016021|GO:0030659|GO:0031410|GO:0004871|GO:0004872|GO:0004930|GO:0004930|GO:0008067	203108_at	Hs.631733	9052	NM_003979
F2RL1	coagulation factor II (thrombin) receptor-like 1	2.33534	up	GO:0007165|GO:0007186|GO:0007186|GO:0007204|GO:0007596|GO:0030193|GO:0005794|GO:0005886|GO:0005887|GO:0016020|GO:0016021|GO:0001584|GO:0004871|GO:0004872|GO:0004872|GO:0004930|GO:0004930|GO:0005102|GO:0008233|GO:0015057	206429_at	Hs.154299	2150	NM_005242
ABBA-1	actin-bundling protein with BAIAP2 homology	2.32296	down	GO:0007165|GO:0007399|GO:0046847|GO:0003779	1555894_s_at	Hs.432387	92154	AA829283
PDK1	pyruvate dehydrogenase kinase, isozyme 1	2.3081	up	GO:0005975|GO:0006006|GO:0006006|GO:0007165|GO:0007264|GO:0018106|GO:0005739|GO:0005739|GO:0005759|GO:0000155|GO:0004672|GO:0004673|GO:0004740|GO:0004740|GO:0005524|GO:0016301|GO:0016740	206686_at	Hs.470633	5163	NM_002610
GRLF1	glucocorticoid receptor DNA binding factor 1	2.29909	down	GO:0001843|GO:0006350|GO:0006350|GO:0006355|GO:0007049|GO:0007165|GO:0007264|GO:0008360|GO:0016481|GO:0030900|GO:0043010|GO:0045786|GO:0005622|GO:0005634|GO:0005634|GO:0005737|GO:0015629|GO:0000166|GO:0003677|GO:0003677|GO:0003714|GO:0004872|GO:0005096|GO:0005525|GO:0016564	229394_s_at	Hs.509447	2909	AI275597
SYNE2	spectrin repeat containing, nuclear envelope 2	2.26946	down	GO:0006350|GO:0006355|GO:0006355|GO:0007165|GO:0007267|GO:0030308|GO:0030520|GO:0005634|GO:0005634|GO:0005737|GO:0005739|GO:0016020|GO:0016021|GO:0031965|GO:0003677|GO:0003677|GO:0003700|GO:0003700|GO:0003707|GO:0003707|GO:0003713|GO:0003779|GO:0004872|GO:0004879|GO:0004879|GO:0005198|GO:0005496|GO:0005496|GO:0005515|GO:0008270|GO:0008289|GO:0030284|GO:0043565|GO:0046872|GO:0048019	202761_s_at	Hs.525392	23224	NM_015180
CABYR	calcium binding tyrosine-(Y)-phosphorylation regulated	2.22255	up	GO:0007165|GO:0005634|GO:0005737|GO:0005856|GO:0005198|GO:0005509|GO:0008603|GO:0046872	224279_s_at	Hs.511983	26256	AF295039
SH3BP2	SH3-domain binding protein 2	2.16615	down	GO:0007165|GO:0005070|GO:0005515	217253_at	Hs.167679	6452	L37198
PRKAR1A	protein kinase, cAMP-dependent, regulatory, type I, alpha (tissue specific extinguisher 1)	2.16305	down	GO:0001932|GO:0006357|GO:0006468|GO:0007165|GO:0007242|GO:0005952|GO:0043234|GO:0000166|GO:0005515|GO:0008603|GO:0008603|GO:0016301|GO:0030552	242482_at	Hs.280342	5573	AI682905
SKAP2	src kinase associated phosphoprotein 2	2.15644	down	GO:0006461|GO:0007165|GO:0008285|GO:0042113|GO:0005737|GO:0005886|GO:0005070	204361_s_at	Hs.200770	8935	AB014486
ACVR1B	activin A receptor, type IB	2.15335	down	GO:0000082|GO:0001701|GO:0001942|GO:0006468|GO:0006468|GO:0006917|GO:0007165|GO:0007178|GO:0009790|GO:0030308|GO:0032927|GO:0045449|GO:0045648|GO:0005887|GO:0009986|GO:0016020|GO:0016021|GO:0000166|GO:0000287|GO:0004672|GO:0004674|GO:0004674|GO:0004675|GO:0004675|GO:0004872|GO:0005024|GO:0005515|GO:0005524|GO:0005524|GO:0016301|GO:0016361|GO:0016740|GO:0017002|GO:0019838|GO:0030145|GO:0046332|GO:…	208223_s_at	Hs.438918	91	NM_020327
GDF15	growth differentiation factor 15	2.15321	up	GO:0000122|GO:0006333|GO:0006350|GO:0006355|GO:0006412|GO:0006412|GO:0006605|GO:0007165|GO:0007179|GO:0007267|GO:0016568|GO:0016568|GO:0016575|GO:0000118|GO:0000228|GO:0005576|GO:0005576|GO:0005615|GO:0005622|GO:0005634|GO:0005634|GO:0005730|GO:0005737|GO:0005840|GO:0022625|GO:0030529|GO:0003723|GO:0003723|GO:0003735|GO:0003735|GO:0004407|GO:0004407|GO:0005125|GO:0005125|GO:0005515|GO:0008083|GO:…	221577_x_at	Hs.616962	9518	AF003934
IL8	interleukin 8	2.14539	up	GO:0001525|GO:0006928|GO:0006935|GO:0006935|GO:0006954|GO:0006954|GO:0006955|GO:0007050|GO:0007155|GO:0007165|GO:0007186|GO:0007242|GO:0007267|GO:0008285|GO:0019722|GO:0030155|GO:0030593|GO:0042119|GO:0045091|GO:0050930|GO:0005576|GO:0005615|GO:0005615|GO:0005125|GO:0005153|GO:0005153|GO:0005515|GO:0008009|GO:0008009	202859_x_at	Hs.551925	3576	NM_000584
SH3BP2	SH3-domain binding protein 2	2.13916	down	GO:0007165|GO:0005070|GO:0005515	217257_at	Hs.167679	6452	L37198
ZFYVE16	zinc finger, FYVE domain containing 16	2.12587	down	GO:0006622|GO:0007165|GO:0016050|GO:0016197|GO:0030100|GO:0005737|GO:0005768|GO:0005769|GO:0016020|GO:0031901|GO:0005515|GO:0005545|GO:0008270|GO:0008565|GO:0046872	203651_at	Hs.482660	9765	NM_014733
PLAUR	plasminogen activator, urokinase receptor	2.09486	up	GO:0006928|GO:0006935|GO:0007165|GO:0007166|GO:0007596|GO:0007596|GO:0030162|GO:0005576|GO:0005886|GO:0005886|GO:0009986|GO:0016020|GO:0016021|GO:0019898|GO:0031225|GO:0004872|GO:0004872|GO:0004872|GO:0005515|GO:0016301|GO:0019899|GO:0030377|GO:0030377	210845_s_at	Hs.466871	5329	U08839
VDR	vitamin D (1,25- dihydroxyvitamin D3) receptor	2.08164	down	GO:0001501|GO:0006350|GO:0006355|GO:0006816|GO:0006874|GO:0007165|GO:0007275|GO:0009887|GO:0016481|GO:0050892|GO:0005634|GO:0003677|GO:0003677|GO:0003677|GO:0003700|GO:0003707|GO:0004872|GO:0004879|GO:0005515|GO:0005515|GO:0008270|GO:0008434|GO:0043565|GO:0046872	204255_s_at	Hs.524368	7421	AA772285
RORA	RAR-related orphan receptor A	2.06911	up	GO:0006350|GO:0006355|GO:0007165|GO:0045944|GO:0005634|GO:0003677|GO:0003700|GO:0003700|GO:0003707|GO:0004872|GO:0004879|GO:0004879|GO:0005515|GO:0008270|GO:0043565|GO:0046872	210479_s_at	Hs.695914	6095	L14611
DDR2	discoidin domain receptor tyrosine kinase 2	2.06554	down	GO:0006468|GO:0007155|GO:0007155|GO:0007165|GO:0007169|GO:0008284|GO:0005887|GO:0016020|GO:0000166|GO:0004713|GO:0004714|GO:0004714|GO:0004872|GO:0005524|GO:0016301|GO:0016740	227561_at	Hs.591469	4921	W73819
TXNRD1	thioredoxin reductase 1	2.04232	up	GO:0006810|GO:0006979|GO:0007165|GO:0008283|GO:0042744|GO:0045454|GO:0055114|GO:0005634|GO:0005737|GO:0005829|GO:0004791|GO:0004791|GO:0008430|GO:0009055|GO:0015035|GO:0016491|GO:0016654|GO:0050660|GO:0050661	201266_at	Hs.708065	7296	NM_003330
INPP5D	inositol polyphosphate-5-phosphatase, 145kDa	2.04142	down	GO:0006796|GO:0006915|GO:0006955|GO:0007165|GO:0005737|GO:0016020|GO:0004437|GO:0004445|GO:0005515|GO:0005515|GO:0016787|GO:0016791	203331_s_at	Hs.262886	3635	U53470
NR2F2	nuclear receptor subfamily 2, group F, member 2	2.04096	down	GO:0001764|GO:0006350|GO:0006355|GO:0006357|GO:0006629|GO:0007165|GO:0009952|GO:0009956|GO:0030900|GO:0048514|GO:0005634|GO:0005634|GO:0003677|GO:0003700|GO:0003706|GO:0003707|GO:0003714|GO:0004872|GO:0004879|GO:0004879|GO:0008270|GO:0043565|GO:0046872	209121_x_at	Hs.701977	7026	M64497
PDCD6	Aryl-hydrocarbon receptor repressor	2.03713	down	GO:0006350|GO:0006355|GO:0006915|GO:0007165|GO:0008624|GO:0045449|GO:0051592|GO:0005634|GO:0005634|GO:0005783|GO:0005783|GO:0005789|GO:0016020|GO:0003677|GO:0004871|GO:0004872|GO:0005509|GO:0005509|GO:0030528|GO:0048306	222380_s_at	Hs.50823	10016	AI907083
NF1	neurofibromin 1 (neurofibromatosis, von Recklinghausen disease, Watson disease)	2.02627	down	GO:0000165|GO:0001649|GO:0001656|GO:0001666|GO:0001889|GO:0001937|GO:0001952|GO:0006469|GO:0007049|GO:0007154|GO:0007165|GO:0007265|GO:0007406|GO:0007420|GO:0007422|GO:0007507|GO:0008542|GO:0014044|GO:0014065|GO:0021510|GO:0021897|GO:0021987|GO:0022011|GO:0030036|GO:0030198|GO:0030199|GO:0030325|GO:0030336|GO:0032318|GO:0032320|GO:0032320|GO:0042060|GO:0042992|GO:0043065|GO:0043407|GO:0043409|GO:…	212678_at	Hs.113577	4763	AW054826
ARNTL2	aryl hydrocarbon receptor nuclear translocator-like 2	2.02616	down	GO:0006350|GO:0006355|GO:0006355|GO:0007165|GO:0009649|GO:0045449|GO:0048511|GO:0005634|GO:0005634|GO:0003677|GO:0003700|GO:0004871|GO:0030528	223586_at		56938	AF256215
SKAP2	src kinase associated phosphoprotein 2	2.00225	down	GO:0006461|GO:0007165|GO:0008285|GO:0042113|GO:0005737|GO:0005886|GO:0005070	216899_s_at	Hs.200770	8935	AC003999
Supplementary table 2 The significantly changed genes involved in nucleus and mitochondrion
nucleus	GO number :	0005634	Percentage of the total number of genes :			0.1922
Gene Symbol	Gene Title	Fold change([Myr] vs [CTL])	Regulation([Myr] vs [CTL])	GO(Avadis)	Probe Set ID	Unigene(Avadis)	Entrez Gene	Representative Public ID
BHLHB2	basic helix-loop-helix domain containing, class B, 2	4.45582	up	GO:0006350|GO:0006355|GO:0006355|GO:0009649|GO:0045449|GO:0045892|GO:0048168|GO:0005634|GO:0005634|GO:0003677|GO:0003700|GO:0005515|GO:0016564|GO:0030528	201170_s_at	Hs.171825	8553	NM_003670
DIDO1	death inducer-obliterator 1	4.27138	down	GO:0006350|GO:0006915|GO:0005634|GO:0005737|GO:0005515|GO:0008270|GO:0046872	227335_at	Hs.517172	11083	AW664953
NDRG1	N-myc downstream regulated gene 1	3.76673	up	GO:0010038|GO:0005634|GO:0005737|GO:0005886|GO:0016020|GO:0005515	200632_s_at	Hs.372914	10397	NM_006096
EID3	EP300 interacting inhibitor of differentiation 3	3.74377	up	GO:0006350|GO:0006355|GO:0005634|GO:0005737	231292_at	Hs.659857	493861	AI964053
SORBS2	sorbin and SH3 domain containing 2	3.70537	down	GO:0005622|GO:0005634|GO:0005634|GO:0015629|GO:0030018|GO:0003676|GO:0005200|GO:0005515|GO:0008093|GO:0008270|GO:0008307	204288_s_at	Hs.655143	8470	NM_021069
WDHD1	WD repeat and HMG-box DNA binding protein 1	3.64513	down	GO:0006355|GO:0005634|GO:0005654|GO:0005737|GO:0003677|GO:0003677	204728_s_at	Hs.385998	11169	NM_007086
KIAA1429	KIAA1429	3.54586	up	GO:0006397|GO:0008380|GO:0005634	243927_x_at	Hs.202238	25962	AI636247
SORBS2	sorbin and SH3 domain containing 2	3.46513	down	GO:0000059|GO:0006606|GO:0006810|GO:0006886|GO:0015031|GO:0005622|GO:0005634|GO:0005634|GO:0005634|GO:0005643|GO:0005737|GO:0005737|GO:0015629|GO:0030018|GO:0003676|GO:0005200|GO:0005488|GO:0005515|GO:0005515|GO:0008093|GO:0008270|GO:0008307|GO:0008536|GO:0008565|GO:0008565|GO:0042393|GO:0042393	225728_at	Hs.655143	8470	AI659533
HELLS	helicase, lymphoid-specific	3.42576	up	GO:0006346|GO:0006350|GO:0006355|GO:0007049|GO:0007067|GO:0007275|GO:0007275|GO:0010216|GO:0031508|GO:0046651|GO:0051301|GO:0000775|GO:0005634|GO:0005721|GO:0000166|GO:0003676|GO:0003677|GO:0004386|GO:0005524|GO:0016787	234040_at	Hs.655830	3070	AU150825
HSPA1A /// HSPA1B	heat shock 70kDa protein 1A /// heat shock 70kDa protein 1B	3.34546	up	GO:0006402|GO:0006916|GO:0006950|GO:0006986|GO:0005634|GO:0005737|GO:0005739|GO:0005783|GO:0000166|GO:0005515|GO:0005524|GO:0051082	200799_at	Hs.520028	3303 /// 3304	NM_005345
PALLD	palladin, cytoskeletal associated protein	3.32471	up	GO:0007010|GO:0009296|GO:0005634|GO:0005737|GO:0005856|GO:0005884|GO:0009424|GO:0003774|GO:0003779|GO:0005515|GO:0051371	200897_s_at	Hs.151220	23022	NM_016081
HSPA1A /// HSPA1B	heat shock 70kDa protein 1A /// heat shock 70kDa protein 1B	3.24284	up	GO:0006402|GO:0006916|GO:0006950|GO:0006986|GO:0005634|GO:0005737|GO:0005739|GO:0005783|GO:0000166|GO:0005515|GO:0005524|GO:0051082	200800_s_at	Hs.520028	3303 /// 3304	NM_005345
RBM24	RNA binding motif protein 24	3.05397	up	GO:0016068|GO:0005634|GO:0005737|GO:0000166|GO:0003676|GO:0003723	235004_at	Hs.519904	221662	AI677701
WDHD1	WD repeat and HMG-box DNA binding protein 1	3.0324	down	GO:0006355|GO:0005634|GO:0005654|GO:0005737|GO:0003677|GO:0003677	216228_s_at	Hs.385998	11169	AK001538
HSPA4L	heat shock 70kDa protein 4-like	3.0086	down	GO:0006457|GO:0006950|GO:0006986|GO:0006986|GO:0005634|GO:0005634|GO:0005737|GO:0005737|GO:0000166|GO:0005515|GO:0005524|GO:0005524	205543_at	Hs.135554	22824	NM_014278
HMOX1	heme oxygenase (decycling) 1	3.00105	up	GO:0001525|GO:0001666|GO:0006788|GO:0006979|GO:0007264|GO:0008217|GO:0008285|GO:0008630|GO:0031670|GO:0032764|GO:0042167|GO:0043123|GO:0043305|GO:0043392|GO:0043433|GO:0043627|GO:0045768|GO:0050896|GO:0005624|GO:0005634|GO:0005730|GO:0005783|GO:0005783|GO:0005792|GO:0005829|GO:0004392|GO:0004392|GO:0004630|GO:0004871|GO:0005506|GO:0005515|GO:0016491|GO:0020037|GO:0046872	203665_at	Hs.517581	3162	NM_002133
HSPA1A /// HSPA1B	heat shock 70kDa protein 1A /// heat shock 70kDa protein 1B	2.97595	up	GO:0006402|GO:0006916|GO:0006950|GO:0006986|GO:0005634|GO:0005737|GO:0005739|GO:0005783|GO:0000166|GO:0005515|GO:0005524|GO:0051082	202581_at	Hs.520028	3303 /// 3304	NM_005346
HELLS	helicase, lymphoid-specific	2.92865	down	GO:0006346|GO:0006350|GO:0006355|GO:0007049|GO:0007067|GO:0007275|GO:0007275|GO:0010216|GO:0031508|GO:0046651|GO:0051301|GO:0000775|GO:0005634|GO:0005721|GO:0000166|GO:0003676|GO:0003677|GO:0004386|GO:0005524|GO:0016787	220085_at	Hs.655830	3070	NM_018063
KIAA1429	KIAA1429	2.89362	down	GO:0006397|GO:0008380|GO:0005634	223110_at	Hs.202238	25962	BC003701
HELLS	helicase, lymphoid-specific	2.8605	down	GO:0006346|GO:0006350|GO:0006355|GO:0007049|GO:0007067|GO:0007275|GO:0007275|GO:0010216|GO:0031508|GO:0046651|GO:0051301|GO:0000775|GO:0005634|GO:0005721|GO:0000166|GO:0003676|GO:0003677|GO:0004386|GO:0005524|GO:0016787	227350_at	Hs.655830	3070	AI889959
EGR1	Early growth response 1	2.79647	up	GO:0000122|GO:0006355|GO:0007611|GO:0030217|GO:0045941|GO:0045944|GO:0005622|GO:0005634|GO:0003700|GO:0008270|GO:0016563|GO:0046872	227404_s_at	Hs.708393	1958	AI459194
ATR	ataxia telangiectasia and Rad3 related	2.76053	down	GO:0000077|GO:0006281|GO:0006281|GO:0006974|GO:0006974|GO:0007049|GO:0007275|GO:0008156|GO:0005634|GO:0005694|GO:0003677|GO:0004672|GO:0004672|GO:0004674|GO:0005488|GO:0005515|GO:0016301|GO:0016740|GO:0016773|GO:0030145|GO:0032405|GO:0032407	209903_s_at	Hs.271791	545	U49844
HELLS	helicase, lymphoid-specific	2.73059	down	GO:0006346|GO:0006350|GO:0006355|GO:0007049|GO:0007067|GO:0007275|GO:0007275|GO:0010216|GO:0031508|GO:0046651|GO:0051301|GO:0000775|GO:0005634|GO:0005721|GO:0000166|GO:0003676|GO:0003677|GO:0004386|GO:0005524|GO:0016787	227349_at	Hs.655830	3070	AI807356
DLG7	discs, large homolog 7 (Drosophila)	2.70375	down	GO:0000087|GO:0000087|GO:0007049|GO:0007079|GO:0007267|GO:0008283|GO:0045842|GO:0005634|GO:0005634|GO:0005634|GO:0005737|GO:0031616|GO:0031616|GO:0004721|GO:0004721|GO:0005515	203764_at	Hs.77695	9787	NM_014750
NF1	neurofibromin 1 (neurofibromatosis, von Recklinghausen disease, Watson disease)	2.63889	up	GO:0000165|GO:0001649|GO:0001656|GO:0001666|GO:0001889|GO:0001937|GO:0001952|GO:0006469|GO:0007049|GO:0007154|GO:0007165|GO:0007265|GO:0007406|GO:0007420|GO:0007422|GO:0007507|GO:0008542|GO:0014044|GO:0014065|GO:0021510|GO:0021897|GO:0021987|GO:0022011|GO:0030036|GO:0030198|GO:0030199|GO:0030325|GO:0030336|GO:0032318|GO:0032320|GO:0032320|GO:0042060|GO:0042992|GO:0043065|GO:0043407|GO:0043409|GO:…	210631_at	Hs.113577	4763	D42072
DHRS2	dehydrogenase/reductase (SDR family) member 2	2.62999	down	GO:0008152|GO:0008207|GO:0008285|GO:0009636|GO:0043011|GO:0055114|GO:0005634|GO:0005634|GO:0005635|GO:0005737|GO:0003824|GO:0004090|GO:0005488|GO:0016491	214079_at	Hs.272499	10202	AK000345
WDR13	WD repeat domain 13	2.62956	up	GO:0005634	222138_s_at	Hs.521973	64743	AF158978
BNIP3L	BCL2/adenovirus E1B 19kDa interacting protein 3-like	2.61177	up	GO:0006915|GO:0006917|GO:0008634|GO:0043065|GO:0043066|GO:0051607|GO:0005634|GO:0005635|GO:0005635|GO:0005739|GO:0005739|GO:0005740|GO:0005783|GO:0005783|GO:0016020|GO:0016021|GO:0031224|GO:0005515|GO:0005521|GO:0042802|GO:0042803|GO:0046982	221478_at	Hs.131226	665	AL132665
THRB	thyroid hormone receptor, beta (erythroblastic leukemia viral (v-erb-a) oncogene homolog 2, avian)	2.59178	down	GO:0006350|GO:0006351|GO:0006355|GO:0007605|GO:0005634|GO:0005634|GO:0003677|GO:0003677|GO:0003700|GO:0003700|GO:0003707|GO:0003714|GO:0004872|GO:0004879|GO:0004887|GO:0004887|GO:0005515|GO:0008270|GO:0043565|GO:0046872	228716_at	Hs.187861	7068	BG494007
KLF3	Kruppel-like factor 3 (basic)	2.56577	down	GO:0000122|GO:0006350|GO:0006355|GO:0007275|GO:0005622|GO:0005634|GO:0003676|GO:0003677|GO:0003700|GO:0008270|GO:0046872	225133_at	Hs.298658	51274	AA130132
MDM1	Mdm1 nuclear protein homolog (mouse)	2.55125	down	GO:0005634	213761_at	Hs.655702	56890	AW664850
PALLD	palladin, cytoskeletal associated protein	2.54736	up	GO:0007010|GO:0009296|GO:0005634|GO:0005737|GO:0005856|GO:0005884|GO:0009424|GO:0003774|GO:0003779|GO:0005515|GO:0051371	200907_s_at	Hs.151220	23022	AU157932
RBL1	retinoblastoma-like 1 (p107)	2.5453	down	GO:0006350|GO:0006355|GO:0007049|GO:0016568|GO:0043550|GO:0045786|GO:0005634|GO:0005515	205296_at	Hs.207745	5933	AL365505
IPO8	importin 8	2.53581	down	GO:0000059|GO:0006810|GO:0006886|GO:0007165|GO:0015031|GO:0005634|GO:0005643|GO:0005737|GO:0005488|GO:0008536|GO:0008565	225528_at	Hs.505136	10526	AU149465
SQSTM1	sequestosome 1	2.44948	up	GO:0006511|GO:0006915|GO:0006950|GO:0006955|GO:0007242|GO:0008104|GO:0016197|GO:0030154|GO:0043122|GO:0043122|GO:0045944|GO:0005634|GO:0005737|GO:0005768|GO:0005770|GO:0005829|GO:0005829|GO:0005515|GO:0005515|GO:0008270|GO:0019901|GO:0019901|GO:0030971|GO:0042169|GO:0042169|GO:0043130|GO:0043130|GO:0046872	213112_s_at	Hs.437277	8878	N30649
BHLHB2	basic helix-loop-helix domain containing, class B, 2	2.44181	up	GO:0006350|GO:0006355|GO:0006355|GO:0009649|GO:0045449|GO:0045892|GO:0048168|GO:0005634|GO:0005634|GO:0003677|GO:0003700|GO:0005515|GO:0016564|GO:0030528	201169_s_at	Hs.171825	8553	BG326045
SPG11	spastic paraplegia 11 (autosomal recessive)	2.43377	down	GO:0005634|GO:0005737|GO:0016020|GO:0016021	203513_at	Hs.656271	80208	NM_025137
PHTF1	putative homeodomain transcription factor 1	2.42746	down	GO:0006350|GO:0006355|GO:0005634|GO:0003677|GO:0003700	210191_s_at	Hs.655824	10745	BC002447
STOX1	storkhead box 1	2.41669	down	GO:0005634|GO:0005737|GO:0003677	1553202_at	Hs.37636	219736	NM_152709
RAD50	RAD50 homolog (S. cerevisiae)	2.41626	down	GO:0000019|GO:0006259|GO:0006281|GO:0006281|GO:0006302|GO:0006302|GO:0006310|GO:0006974|GO:0007004|GO:0007049|GO:0007126|GO:0007131|GO:0000781|GO:0005634|GO:0005694|GO:0030870|GO:0030870|GO:0030870|GO:0000014|GO:0000166|GO:0003677|GO:0004518|GO:0005515|GO:0005524|GO:0008270|GO:0008408|GO:0016787|GO:0030674|GO:0046872	208393_s_at	Hs.655835	10111	NM_005732
VRK1	vaccinia related kinase 1	2.39608	down	GO:0006468|GO:0006468|GO:0005634|GO:0000166|GO:0004672|GO:0004674|GO:0004674|GO:0005524|GO:0016301|GO:0016740	203856_at	Hs.422662	7443	NM_003384
SSBP3	single stranded DNA binding protein 3	2.38663	down	GO:0006350|GO:0006355|GO:0005634|GO:0003677|GO:0003697|GO:0030528	223635_s_at	Hs.658676	23648	BC003605
KLF4	Kruppel-like factor 4 (gut)	2.38658	up	GO:0006350|GO:0006355|GO:0007500|GO:0008285|GO:0045892|GO:0045892|GO:0005622|GO:0005634|GO:0003676|GO:0003677|GO:0003700|GO:0003700|GO:0008270|GO:0008270|GO:0016563|GO:0016564|GO:0016564|GO:0046872	221841_s_at	Hs.376206	9314	BF514079
WDHD1	WD repeat and HMG-box DNA binding protein 1	2.36755	down	GO:0006355|GO:0005634|GO:0005654|GO:0005737|GO:0003677|GO:0003677	204727_at	Hs.385998	11169	AW772140
NFATC2	Nuclear factor of activated T-cells, cytoplasmic, calcineurin-dependent 2	2.36028	down	GO:0006350|GO:0006355|GO:0006355|GO:0045449|GO:0045941|GO:0005634|GO:0005634|GO:0005737|GO:0005737|GO:0003677|GO:0003677|GO:0003700|GO:0003700|GO:0005515|GO:0016563	226991_at	Hs.356321	4773	AA489681
ZNF280D	zinc finger protein 280D	2.35933	down	GO:0006350|GO:0006355|GO:0005622|GO:0005634|GO:0003676|GO:0003677|GO:0008270|GO:0046872	221213_s_at	Hs.511477	54816	NM_017661
SETD4	SET domain containing 4	2.3365	up	GO:0005634	213989_x_at	Hs.606200	54093	AB004853
PTRF	polymerase I and transcript release factor	2.31794	down	GO:0006350|GO:0006353|GO:0006355|GO:0006361|GO:0005634|GO:0005634|GO:0005737|GO:0005737|GO:0005739|GO:0005739|GO:0005783|GO:0005792|GO:0005886|GO:0005901|GO:0016020|GO:0003716|GO:0003716|GO:0003723|GO:0005515|GO:0019843|GO:0042134|GO:0042134	208790_s_at	Hs.437191	284119	AF312393
BICD1	bicaudal D homolog 1 (Drosophila)	2.31118	up	GO:0006396|GO:0008298|GO:0009653|GO:0005634|GO:0005794|GO:0005856|GO:0005200|GO:0005488	1554020_at	Hs.505202	636	BC010091
DYX1C1	dyslexia susceptibility 1 candidate 1	2.30737	down	GO:0005634|GO:0005488	235273_at	Hs.126403	161582	AI674107
GRLF1	glucocorticoid receptor DNA binding factor 1	2.29909	down	GO:0001843|GO:0006350|GO:0006350|GO:0006355|GO:0007049|GO:0007165|GO:0007264|GO:0008360|GO:0016481|GO:0030900|GO:0043010|GO:0045786|GO:0005622|GO:0005634|GO:0005634|GO:0005737|GO:0015629|GO:0000166|GO:0003677|GO:0003677|GO:0003714|GO:0004872|GO:0005096|GO:0005525|GO:0016564	229394_s_at	Hs.509447	2909	AI275597
SUV420H1	suppressor of variegation 4-20 homolog 1 (Drosophila)	2.29753	down	GO:0006350|GO:0006355|GO:0016568|GO:0005634|GO:0005694|GO:0005515|GO:0008168|GO:0016740|GO:0018024	218242_s_at	Hs.632120	51111	NM_017635
JUN	Jun oncogene	2.27659	up	GO:0006350|GO:0006355|GO:0009987|GO:0031953|GO:0035026|GO:0045449|GO:0045944|GO:0000228|GO:0005634|GO:0005667|GO:0003677|GO:0003677|GO:0003700|GO:0003700|GO:0003702|GO:0005515|GO:0043565|GO:0046983	213281_at	Hs.525704	3725	BE327172
EGR1	early growth response 1	2.27188	up	GO:0000122|GO:0006350|GO:0006355|GO:0007611|GO:0030217|GO:0045941|GO:0045944|GO:0005622|GO:0005634|GO:0005634|GO:0003676|GO:0003677|GO:0003677|GO:0003700|GO:0003700|GO:0008270|GO:0016563|GO:0046872	201693_s_at	Hs.326035	1958	AV733950
ATR	ataxia telangiectasia and Rad3 related	2.27023	down	GO:0000077|GO:0006281|GO:0006281|GO:0006974|GO:0006974|GO:0007049|GO:0007275|GO:0008156|GO:0005634|GO:0005694|GO:0003677|GO:0004672|GO:0004672|GO:0004674|GO:0005488|GO:0005515|GO:0016301|GO:0016740|GO:0016773|GO:0030145|GO:0032405|GO:0032407	209902_at	Hs.271791	545	U49844
SYNE2	spectrin repeat containing, nuclear envelope 2	2.26946	down	GO:0006350|GO:0006355|GO:0006355|GO:0007165|GO:0007267|GO:0030308|GO:0030520|GO:0005634|GO:0005634|GO:0005737|GO:0005739|GO:0016020|GO:0016021|GO:0031965|GO:0003677|GO:0003677|GO:0003700|GO:0003700|GO:0003707|GO:0003707|GO:0003713|GO:0003779|GO:0004872|GO:0004879|GO:0004879|GO:0005198|GO:0005496|GO:0005496|GO:0005515|GO:0008270|GO:0008289|GO:0030284|GO:0043565|GO:0046872|GO:0048019	202761_s_at	Hs.525392	23224	NM_015180
CMAS	cytidine monophosphate N-acetylneuraminic acid synthetase	2.26823	down	GO:0009103|GO:0005634|GO:0008781|GO:0016740|GO:0016779	218111_s_at	Hs.311346	55907	NM_018686
JUN	jun oncogene	2.25105	up	GO:0006350|GO:0006355|GO:0009987|GO:0031953|GO:0035026|GO:0045449|GO:0045944|GO:0000228|GO:0005634|GO:0005667|GO:0003677|GO:0003677|GO:0003700|GO:0003700|GO:0003702|GO:0005515|GO:0043565|GO:0046983	201464_x_at	Hs.525704	3725	BG491844
THRB	thyroid hormone receptor, beta (erythroblastic leukemia viral (v-erb-a) oncogene homolog 2, avian)	2.24229	down	GO:0006350|GO:0006351|GO:0006355|GO:0007605|GO:0005634|GO:0005634|GO:0003677|GO:0003677|GO:0003700|GO:0003700|GO:0003707|GO:0003714|GO:0004872|GO:0004879|GO:0004887|GO:0004887|GO:0005515|GO:0008270|GO:0043565|GO:0046872	229657_at	Hs.187861	7068	BF431989
CLUAP1	clusterin associated protein 1	2.2233	down	GO:0005634|GO:0005515	204577_s_at	Hs.155995	23059	NM_024793
CABYR	calcium binding tyrosine-(Y)-phosphorylation regulated	2.22255	up	GO:0007165|GO:0005634|GO:0005737|GO:0005856|GO:0005198|GO:0005509|GO:0008603|GO:0046872	224279_s_at	Hs.511983	26256	AF295039
PHF12	PHD finger protein 12	2.21515	down	GO:0006350|GO:0006355|GO:0045892|GO:0005634|GO:0005634|GO:0017053|GO:0005515|GO:0005515|GO:0008270|GO:0016564|GO:0046872	231815_at	Hs.444173	57649	AB040956
HNRPDL	heterogeneous nuclear ribonucleoprotein D-like	2.21058	down	GO:0006350|GO:0006355|GO:0006396|GO:0005634|GO:0005634|GO:0005737|GO:0030530|GO:0000166|GO:0003676|GO:0003677|GO:0003690|GO:0003697|GO:0003723|GO:0005515|GO:0008143	209067_s_at	Hs.527105	9987	D89092
HELLS	helicase, lymphoid-specific	2.20792	down	GO:0006346|GO:0006350|GO:0006355|GO:0007049|GO:0007067|GO:0007275|GO:0007275|GO:0010216|GO:0031508|GO:0046651|GO:0051301|GO:0000775|GO:0005634|GO:0005721|GO:0000166|GO:0003676|GO:0003677|GO:0004386|GO:0005524|GO:0016787	223556_at	Hs.655830	3070	AF155827
IGFBP3	insulin-like growth factor binding protein 3	2.20743	up	GO:0001558|GO:0001933|GO:0006468|GO:0009968|GO:0043065|GO:0045663|GO:0005576|GO:0005576|GO:0005634|GO:0005515|GO:0005520|GO:0005520|GO:0008160|GO:0019838|GO:0046872	210095_s_at	Hs.450230	3486	M31159
DIMT1L	DIM1 dimethyladenosine transferase 1-like (S. cerevisiae)	2.19055	down	GO:0000154|GO:0006364|GO:0005634|GO:0000179|GO:0003723|GO:0008168|GO:0008649|GO:0016433|GO:0016740	213598_at	Hs.533222	27292	W87688
RTCD1	RNA terminal phosphate cyclase domain 1	2.18628	down	GO:0000244|GO:0006396|GO:0005634|GO:0005654|GO:0003723|GO:0003824|GO:0003963|GO:0003963|GO:0016874|GO:0016886	203594_at	Hs.552835	8634	NM_003729
ZFX	zinc finger protein, X-linked	2.17921	down	GO:0006350|GO:0006355|GO:0045449|GO:0005622|GO:0005634|GO:0003676|GO:0003677|GO:0003677|GO:0003713|GO:0008270|GO:0030528|GO:0046872	229022_at	Hs.336681	7543	AI745209
CENPE	centromere protein E, 312kDa	2.16161	down	GO:0000089|GO:0007018|GO:0007049|GO:0007067|GO:0007079|GO:0007080|GO:0051301|GO:0051382|GO:0000775|GO:0000775|GO:0000940|GO:0005634|GO:0005634|GO:0005819|GO:0005874|GO:0005875|GO:0000166|GO:0003774|GO:0003777|GO:0003777|GO:0005515|GO:0005524|GO:0043515	205046_at	Hs.75573	1062	NM_001813
ZBTB20	zinc finger and BTB domain containing 20	2.15388	down	GO:0006350|GO:0006355|GO:0005622|GO:0005634|GO:0003676|GO:0003677|GO:0005515|GO:0008270|GO:0046872	222357_at	Hs.655108	26137	AW974823
GDF15	growth differentiation factor 15	2.15321	up	GO:0000122|GO:0006333|GO:0006350|GO:0006355|GO:0006412|GO:0006412|GO:0006605|GO:0007165|GO:0007179|GO:0007267|GO:0016568|GO:0016568|GO:0016575|GO:0000118|GO:0000228|GO:0005576|GO:0005576|GO:0005615|GO:0005622|GO:0005634|GO:0005634|GO:0005730|GO:0005737|GO:0005840|GO:0022625|GO:0030529|GO:0003723|GO:0003723|GO:0003735|GO:0003735|GO:0004407|GO:0004407|GO:0005125|GO:0005125|GO:0005515|GO:0008083|GO:…	221577_x_at	Hs.616962	9518	AF003934
SESN2	sestrin 2	2.1454	down	GO:0007050|GO:0005634|GO:0005737	223196_s_at	Hs.469543	83667	AL136551
MAZ	MYC-associated zinc finger protein (purine-binding transcription factor)	2.14037	down	GO:0006350|GO:0006355|GO:0006367|GO:0006369|GO:0005622|GO:0005634|GO:0003676|GO:0003677|GO:0003702|GO:0003723|GO:0008270|GO:0046872	207824_s_at	Hs.23650	4150	NM_002383
MAFF	v-maf musculoaponeurotic fibrosarcoma oncogene homolog F (avian)	2.12556	up	GO:0001701|GO:0006350|GO:0006355|GO:0006366|GO:0006950|GO:0007567|GO:0045449|GO:0045604|GO:0005634|GO:0003677|GO:0003700|GO:0043565|GO:0046983	36711_at	Hs.517617	23764	AL021977
A1CF	APOBEC1 complementation factor	2.12534	down	GO:0006397|GO:0050821|GO:0005622|GO:0005634|GO:0005737|GO:0005737|GO:0005783|GO:0030895|GO:0000166|GO:0003676|GO:0003723|GO:0003723|GO:0003725|GO:0003725|GO:0003727|GO:0005515	220951_s_at	Hs.499643	29974	NM_014576
SLC2A4RG	SLC2A4 regulator	2.12257	down	GO:0006350|GO:0006355|GO:0006355|GO:0005622|GO:0005634|GO:0005634|GO:0005737|GO:0003676|GO:0003677|GO:0003700|GO:0008270|GO:0046872	222650_s_at	Hs.435126	56731	BE898559
SRP54	signal recognition particle 54kDa	2.11786	down	GO:0006614|GO:0006614|GO:0005634|GO:0005730|GO:0005737|GO:0005737|GO:0005786|GO:0016020|GO:0016607|GO:0030529|GO:0048500|GO:0000166|GO:0003723|GO:0003723|GO:0005525|GO:0008312|GO:0008312|GO:0017111|GO:0043021	203605_at	Hs.167535	6729	NM_003136
SLC2A4RG	SLC2A4 regulator	2.11704	down	GO:0006350|GO:0006355|GO:0006355|GO:0005622|GO:0005634|GO:0005634|GO:0005737|GO:0003676|GO:0003677|GO:0003700|GO:0008270|GO:0046872	218494_s_at	Hs.435126	56731	NM_020062
ZKSCAN1	zinc finger with KRAB and SCAN domains 1	2.1128	down	GO:0006350|GO:0006355|GO:0006355|GO:0005622|GO:0005634|GO:0005634|GO:0003676|GO:0003677|GO:0003700|GO:0003700|GO:0008270|GO:0046872	1557953_at	Hs.615360	7586	BG761185
LOC100131851 /// LOC100134497 /// LOC401002 /// LOC646674 /// SSBP3	single stranded DNA binding protein 3 /// similar to single stranded DNA binding protein 3 /// hypothetical LOC646674 /// hypothetical protein LOC100131851 /// hypothetical protein LOC100134497	2.11005	down	GO:0006350|GO:0006355|GO:0005634|GO:0003677|GO:0003697|GO:0030528	222482_at	Hs.658676	100131851 /// 100134497 /// 23648 /// 401002 /// 646674	AA102468
FOXP4	forkhead box P4	2.10924	down	GO:0006350|GO:0006355|GO:0005622|GO:0005634|GO:0003676|GO:0003677|GO:0003700|GO:0008270|GO:0043565|GO:0046872	227120_at	Hs.131436	116113	AI673539
HNRNPD	heterogeneous nuclear ribonucleoprotein D (AU-rich element RNA binding protein 1, 37kDa)	2.10298	down	GO:0006350|GO:0006355|GO:0006355|GO:0006396|GO:0006401|GO:0000781|GO:0005634|GO:0005634|GO:0005634|GO:0005694|GO:0030529|GO:0030530|GO:0000166|GO:0003676|GO:0003677|GO:0003723|GO:0003723|GO:0003723|GO:0005515|GO:0016563	209330_s_at	Hs.480073	3184	D55674
PKP2	plakophilin 2	2.10267	down	GO:0007155|GO:0016337|GO:0005634|GO:0005634|GO:0005737|GO:0005856|GO:0005886|GO:0005911|GO:0016021|GO:0030054|GO:0030057|GO:0005198|GO:0005488|GO:0005515	207717_s_at	Hs.164384	5318	NM_004572
ATRX	alpha thalassemia/mental retardation syndrome X-linked (RAD54 homolog, S. cerevisiae)	2.10018	down	GO:0006281|GO:0006281|GO:0006306|GO:0006310|GO:0006355|GO:0006974|GO:0007605|GO:0005634|GO:0005634|GO:0005720|GO:0000166|GO:0003676|GO:0003677|GO:0003678|GO:0003700|GO:0004386|GO:0004386|GO:0005515|GO:0005515|GO:0005524|GO:0008270|GO:0016787|GO:0046872	208859_s_at	Hs.533526	546	AI650257
SMARCA4	SWI/SNF related, matrix associated, actin dependent regulator of chromatin, subfamily a, member 4	2.09605	down	GO:0000122|GO:0001832|GO:0001835|GO:0006346|GO:0006350|GO:0006355|GO:0006357|GO:0007403|GO:0030900|GO:0030902|GO:0000792|GO:0005634|GO:0005634|GO:0005654|GO:0000166|GO:0003676|GO:0003677|GO:0003682|GO:0003700|GO:0003713|GO:0004386|GO:0004386|GO:0005515|GO:0005524|GO:0008134|GO:0016787|GO:0042802|GO:0047485	212520_s_at	Hs.327527	6597	AI684141
BUB1	BUB1 budding uninhibited by benzimidazoles 1 homolog (yeast)	2.09572	down	GO:0006468|GO:0007049|GO:0007067|GO:0007093|GO:0007094|GO:0008283|GO:0051301|GO:0000776|GO:0000776|GO:0005634|GO:0005816|GO:0000166|GO:0004672|GO:0004672|GO:0004674|GO:0005524|GO:0016301|GO:0016740	209642_at	Hs.469649	699	AF043294
CNOT3	CCR4-NOT transcription complex, subunit 3	2.09563	down	GO:0006350|GO:0006355|GO:0045449|GO:0005634|GO:0005737|GO:0005515|GO:0030528	229143_at	Hs.343571	4849	AW449353
BNIP3L	BCL2/adenovirus E1B 19kDa interacting protein 3-like	2.08461	up	GO:0006915|GO:0006917|GO:0008634|GO:0043065|GO:0043066|GO:0051607|GO:0005634|GO:0005635|GO:0005635|GO:0005739|GO:0005739|GO:0005740|GO:0005783|GO:0005783|GO:0016020|GO:0016021|GO:0031224|GO:0005515|GO:0005521|GO:0042802|GO:0042803|GO:0046982	221479_s_at	Hs.131226	665	AF060922
VDR	vitamin D (1,25- dihydroxyvitamin D3) receptor	2.08164	down	GO:0001501|GO:0006350|GO:0006355|GO:0006816|GO:0006874|GO:0007165|GO:0007275|GO:0009887|GO:0016481|GO:0050892|GO:0005634|GO:0003677|GO:0003677|GO:0003677|GO:0003700|GO:0003707|GO:0004872|GO:0004879|GO:0005515|GO:0005515|GO:0008270|GO:0008434|GO:0043565|GO:0046872	204255_s_at	Hs.524368	7421	AA772285
SQSTM1	sequestosome 1	2.07855	up	GO:0006511|GO:0006915|GO:0006950|GO:0006955|GO:0007242|GO:0008104|GO:0016197|GO:0030154|GO:0043122|GO:0043122|GO:0045944|GO:0005634|GO:0005737|GO:0005768|GO:0005770|GO:0005829|GO:0005829|GO:0005515|GO:0005515|GO:0008270|GO:0019901|GO:0019901|GO:0030971|GO:0042169|GO:0042169|GO:0043130|GO:0043130|GO:0046872	201471_s_at	Hs.437277	8878	NM_003900
DENND4A	DENN/MADD domain containing 4A	2.07362	down	GO:0006350|GO:0006355|GO:0006355|GO:0005634|GO:0005634|GO:0003677|GO:0003677|GO:0005515	214787_at	Hs.654567	10260	BE268538
PCF11	PCF11, cleavage and polyadenylation factor subunit, homolog (S. cerevisiae)	2.0727	down	GO:0006379|GO:0006397|GO:0005634|GO:0005849	203378_at	Hs.128959	51585	AB020631
MED13	mediator complex subunit 13	2.07164	up	GO:0006350|GO:0006355|GO:0006367|GO:0030518|GO:0030521|GO:0045944|GO:0000119|GO:0005634|GO:0005634|GO:0003712|GO:0003713|GO:0003713|GO:0004872|GO:0016455|GO:0016563|GO:0030374|GO:0042809|GO:0046966	223780_s_at	Hs.282678	9969	AF151055
KIAA2018	KIAA2018	2.07096	down	GO:0045449|GO:0005634|GO:0016020|GO:0003677|GO:0004571|GO:0005509|GO:0030528	227435_at	Hs.632570	205717	AI962192
RGS3	regulator of G-protein signaling 3	2.07032	up	GO:0000188|GO:0008277|GO:0009968|GO:0005634|GO:0005737|GO:0005829|GO:0016020|GO:0004871|GO:0005096|GO:0005515	220300_at	Hs.494875	5998	NM_017790
RORA	RAR-related orphan receptor A	2.06911	up	GO:0006350|GO:0006355|GO:0007165|GO:0045944|GO:0005634|GO:0003677|GO:0003700|GO:0003700|GO:0003707|GO:0004872|GO:0004879|GO:0004879|GO:0005515|GO:0008270|GO:0043565|GO:0046872	210479_s_at	Hs.695914	6095	L14611
KIAA1333	KIAA1333	2.06641	down	GO:0006464|GO:0006512|GO:0005622|GO:0005634|GO:0005737|GO:0004842|GO:0005515|GO:0005515|GO:0008270|GO:0016874|GO:0046872	223254_s_at	Hs.509008	55632	AA887053
ARID1A	AT rich interactive domain 1A (SWI-like)	2.06543	down	GO:0006350|GO:0006355|GO:0016568|GO:0030520|GO:0030521|GO:0042766|GO:0042921|GO:0048096|GO:0005622|GO:0005634|GO:0005634|GO:0016514|GO:0003677|GO:0003677|GO:0003677|GO:0005515|GO:0005515|GO:0016563	210649_s_at	Hs.468972	8289	AF231056
THOC2	THO complex 2	2.06401	down	GO:0006397|GO:0006810|GO:0008380|GO:0051028|GO:0005634|GO:0003723	222122_s_at	Hs.592243	57187	BG403671
DONSON	downstream neighbor of SON	2.06212	down	GO:0007275|GO:0005634	221677_s_at	Hs.436341	29980	AF232674
IGF2BP2	insulin-like growth factor 2 mRNA binding protein 2	2.05859	down	GO:0006412|GO:0006412|GO:0006412|GO:0006417|GO:0009653|GO:0017148|GO:0042035|GO:0005622|GO:0005634|GO:0005737|GO:0005737|GO:0005840|GO:0015935|GO:0015935|GO:0022627|GO:0030529|GO:0044430|GO:0000166|GO:0003676|GO:0003723|GO:0003723|GO:0003735|GO:0003735|GO:0003735|GO:0005515|GO:0019843|GO:0045182|GO:0048027	223963_s_at	Hs.35354	10644	AF117107
SDCCAG1	serologically defined colon cancer antigen 1	2.05791	down	GO:0005634	1557950_at	Hs.655964	9147	BF984340
KLF5	Kruppel-like factor 5 (intestinal)	2.05755	up	GO:0001525|GO:0006350|GO:0006355|GO:0006366|GO:0008284|GO:0030033|GO:0045941|GO:0005622|GO:0005634|GO:0003676|GO:0003677|GO:0003700|GO:0003702|GO:0005515|GO:0008270|GO:0046872	209211_at	Hs.508234	688	AF132818
FOS	v-fos FBJ murine osteosarcoma viral oncogene homolog	2.04645	up	GO:0006306|GO:0006355|GO:0006357|GO:0006954|GO:0007399|GO:0045449|GO:0005634|GO:0005634|GO:0005667|GO:0003677|GO:0003690|GO:0003700|GO:0003704|GO:0005515|GO:0043565|GO:0046982|GO:0046983	209189_at	Hs.25647	2353	BC004490
TXNRD1	thioredoxin reductase 1	2.04232	up	GO:0006810|GO:0006979|GO:0007165|GO:0008283|GO:0042744|GO:0045454|GO:0055114|GO:0005634|GO:0005737|GO:0005829|GO:0004791|GO:0004791|GO:0008430|GO:0009055|GO:0015035|GO:0016491|GO:0016654|GO:0050660|GO:0050661	201266_at	Hs.708065	7296	NM_003330
NR2F2	nuclear receptor subfamily 2, group F, member 2	2.04096	down	GO:0001764|GO:0006350|GO:0006355|GO:0006357|GO:0006629|GO:0007165|GO:0009952|GO:0009956|GO:0030900|GO:0048514|GO:0005634|GO:0005634|GO:0003677|GO:0003700|GO:0003706|GO:0003707|GO:0003714|GO:0004872|GO:0004879|GO:0004879|GO:0008270|GO:0043565|GO:0046872	209121_x_at	Hs.701977	7026	M64497
PDCD6	Aryl-hydrocarbon receptor repressor	2.03713	down	GO:0006350|GO:0006355|GO:0006915|GO:0007165|GO:0008624|GO:0045449|GO:0051592|GO:0005634|GO:0005634|GO:0005783|GO:0005783|GO:0005789|GO:0016020|GO:0003677|GO:0004871|GO:0004872|GO:0005509|GO:0005509|GO:0030528|GO:0048306	222380_s_at	Hs.50823	10016	AI907083
SMC4	structural maintenance of chromosomes 4	2.02908	down	GO:0000070|GO:0006259|GO:0007049|GO:0007067|GO:0007076|GO:0007076|GO:0051276|GO:0051301|GO:0000796|GO:0005634|GO:0005634|GO:0005694|GO:0005737|GO:0000166|GO:0005515|GO:0005524|GO:0005524|GO:0046982	215623_x_at	Hs.58992	10051	AK002200
RCOR3	REST corepressor 3	2.02877	up	GO:0006350|GO:0006355|GO:0005634|GO:0003677|GO:0005515	218344_s_at	Hs.696152	55758	NM_018254
ZSCAN16	zinc finger and SCAN domain containing 16	2.02866	down	GO:0006350|GO:0006355|GO:0005622|GO:0005634|GO:0003676|GO:0003677|GO:0003700|GO:0008270|GO:0046872	219676_at	Hs.656641	80345	NM_025231
NF1	neurofibromin 1 (neurofibromatosis, von Recklinghausen disease, Watson disease)	2.02627	down	GO:0000165|GO:0001649|GO:0001656|GO:0001666|GO:0001889|GO:0001937|GO:0001952|GO:0006469|GO:0007049|GO:0007154|GO:0007165|GO:0007265|GO:0007406|GO:0007420|GO:0007422|GO:0007507|GO:0008542|GO:0014044|GO:0014065|GO:0021510|GO:0021897|GO:0021987|GO:0022011|GO:0030036|GO:0030198|GO:0030199|GO:0030325|GO:0030336|GO:0032318|GO:0032320|GO:0032320|GO:0042060|GO:0042992|GO:0043065|GO:0043407|GO:0043409|GO:…	212678_at	Hs.113577	4763	AW054826
ARNTL2	aryl hydrocarbon receptor nuclear translocator-like 2	2.02616	down	GO:0006350|GO:0006355|GO:0006355|GO:0007165|GO:0009649|GO:0045449|GO:0048511|GO:0005634|GO:0005634|GO:0003677|GO:0003700|GO:0004871|GO:0030528	223586_at		56938	AF256215
ZNF326	zinc finger protein 326	2.02581	down	GO:0006350|GO:0006355|GO:0005622|GO:0005634|GO:0016363|GO:0003677|GO:0008270|GO:0046872	241720_at	Hs.306221	284695	BG501875
TRA2A	transformer-2 alpha	2.02379	down	GO:0000398|GO:0006397|GO:0008380|GO:0005634|GO:0005634|GO:0000166|GO:0003676|GO:0003723|GO:0042802	204658_at	Hs.699226	29896	NM_013293
C9orf86	chromosome 9 open reading frame 86	2.0236	down	GO:0007264|GO:0005622|GO:0005634|GO:0005737|GO:0000166|GO:0005515|GO:0005525	225377_at	Hs.567803	55684	BE783949
ANKRD37	ankyrin repeat domain 37	2.01913	up	GO:0005634|GO:0005737	227337_at	Hs.708185	353322	AA886870
BAZ2B	bromodomain adjacent to zinc finger domain, 2B	2.00797	down	GO:0006350|GO:0006355|GO:0005634|GO:0003677|GO:0005515|GO:0008270|GO:0046872	203080_s_at	Hs.470369	29994	NM_013450
KLHDC2	kelch domain containing 2	2.00501	down	GO:0005634|GO:0005515|GO:0005515	217906_at	Hs.509264	23588	NM_014315
CMIP	c-Maf-inducing protein	2.0049	down	GO:0005634|GO:0005737	224991_at	Hs.709248	80790	AI819630
mitochondrion（GO:）	GO number :	0005739	Percentage of the total number of genes :			0.042
Gene Symbol	Gene Title	Fold change([Myr] vs [CTL])	Regulation ([Myr] vs [CTL])	GO(Avadis)	Probe Set ID	Unigene (Avadis)	Entrez Gene	Representative Public ID
CHDH	choline dehydrogenase	3.64548	down	GO:0006066|GO:0005739|GO:0005743|GO:0008812|GO:0016491|GO:0016614|GO:0050660	1559590_at	Hs.126688	55349	AA609488
HSPA1A /// HSPA1B	heat shock 70kDa protein 1A /// heat shock 70kDa protein 1B	3.34546	up	GO:0006402|GO:0006916|GO:0006950|GO:0006986|GO:0005634|GO:0005737|GO:0005739|GO:0005783|GO:0000166|GO:0005515|GO:0005524|GO:0051082	200799_at	Hs.520028	3303 /// 3304	NM_005345
HSPA1A /// HSPA1B	heat shock 70kDa protein 1A /// heat shock 70kDa protein 1B	3.24284	up	GO:0006402|GO:0006916|GO:0006950|GO:0006986|GO:0005634|GO:0005737|GO:0005739|GO:0005783|GO:0000166|GO:0005515|GO:0005524|GO:0051082	200800_s_at	Hs.520028	3303 /// 3304	NM_005345
HSPA1A /// HSPA1B	heat shock 70kDa protein 1A /// heat shock 70kDa protein 1B	2.97595	up	GO:0006402|GO:0006916|GO:0006950|GO:0006986|GO:0005634|GO:0005737|GO:0005739|GO:0005783|GO:0000166|GO:0005515|GO:0005524|GO:0051082	202581_at	Hs.520028	3303 /// 3304	NM_005346
GLS	glutaminase	2.91632	up	GO:0006541|GO:0006543|GO:0005739|GO:0005739|GO:0004359|GO:0004359|GO:0016787	203159_at	Hs.116448	2744	NM_014905
AMACR /// C1QTNF3	alpha-methylacyl-CoA racemase /// C1q and tumor necrosis factor related protein 3	2.79234	down	GO:0006817|GO:0008152|GO:0005576|GO:0005737|GO:0005739|GO:0005739|GO:0005777|GO:0005777|GO:0003824|GO:0008111|GO:0016491|GO:0016853	209425_at	Hs.171929	114899 /// 23600	AA888589
BNIP3L	BCL2/adenovirus E1B 19kDa interacting protein 3-like	2.61177	up	GO:0006915|GO:0006917|GO:0008634|GO:0043065|GO:0043066|GO:0051607|GO:0005634|GO:0005635|GO:0005635|GO:0005739|GO:0005739|GO:0005740|GO:0005783|GO:0005783|GO:0016020|GO:0016021|GO:0031224|GO:0005515|GO:0005521|GO:0042802|GO:0042803|GO:0046982	221478_at	Hs.131226	665	AL132665
GLS	glutaminase	2.51986	up	GO:0006541|GO:0006543|GO:0005739|GO:0005739|GO:0004359|GO:0004359|GO:0016787	203157_s_at	Hs.116448	2744	AB020645
STARD13	StAR-related lipid transfer (START) domain containing 13	2.49304	down	GO:0007049|GO:0007165|GO:0045786|GO:0005622|GO:0005737|GO:0005739|GO:0005811|GO:0012511|GO:0016020|GO:0005096|GO:0005515	213103_at	Hs.507704	90627	AA128023
SARDH	sarcosine dehydrogenase	2.455	down	GO:0006546|GO:0005737|GO:0005739|GO:0005739|GO:0005759|GO:0005759|GO:0004047|GO:0008480|GO:0008480|GO:0009055|GO:0016491	210063_at	Hs.198003	1757	AF162428
PTRF	polymerase I and transcript release factor	2.31794	down	GO:0006350|GO:0006353|GO:0006355|GO:0006361|GO:0005634|GO:0005634|GO:0005737|GO:0005737|GO:0005739|GO:0005739|GO:0005783|GO:0005792|GO:0005886|GO:0005901|GO:0016020|GO:0003716|GO:0003716|GO:0003723|GO:0005515|GO:0019843|GO:0042134|GO:0042134	208790_s_at	Hs.437191	284119	AF312393
ABAT	4-aminobutyrate aminotransferase	2.31316	down	GO:0007610|GO:0009448|GO:0009450|GO:0042135|GO:0042135|GO:0048148|GO:0005739|GO:0005739|GO:0005739|GO:0005759|GO:0032144|GO:0003824|GO:0003867|GO:0003867|GO:0008483|GO:0016740|GO:0030170|GO:0030170|GO:0032145|GO:0042803|GO:0047298	209459_s_at	Hs.336768	18	AF237813
PDK1	pyruvate dehydrogenase kinase, isozyme 1	2.3081	up	GO:0005975|GO:0006006|GO:0006006|GO:0007165|GO:0007264|GO:0018106|GO:0005739|GO:0005739|GO:0005759|GO:0000155|GO:0004672|GO:0004673|GO:0004740|GO:0004740|GO:0005524|GO:0016301|GO:0016740	206686_at	Hs.470633	5163	NM_002610
GPAM	glycerol-3-phosphate acyltransferase, mitochondrial	2.29177	down	GO:0008152|GO:0008654|GO:0005739|GO:0005741|GO:0016020|GO:0016021|GO:0004366|GO:0008415|GO:0016740	225420_at	Hs.42586	57678	AV699379
AASS	aminoadipate-semialdehyde synthase	2.28415	down	GO:0006554|GO:0008152|GO:0051262|GO:0005739|GO:0005739|GO:0003824|GO:0005488|GO:0009055|GO:0016491|GO:0047130|GO:0047131|GO:0047131	214829_at	Hs.156738	10157	AK023446
SYNE2	spectrin repeat containing, nuclear envelope 2	2.26946	down	GO:0006350|GO:0006355|GO:0006355|GO:0007165|GO:0007267|GO:0030308|GO:0030520|GO:0005634|GO:0005634|GO:0005737|GO:0005739|GO:0016020|GO:0016021|GO:0031965|GO:0003677|GO:0003677|GO:0003700|GO:0003700|GO:0003707|GO:0003707|GO:0003713|GO:0003779|GO:0004872|GO:0004879|GO:0004879|GO:0005198|GO:0005496|GO:0005496|GO:0005515|GO:0008270|GO:0008289|GO:0030284|GO:0043565|GO:0046872|GO:0048019	202761_s_at	Hs.525392	23224	NM_015180
LACTB	lactamase, beta	2.22665	down	GO:0030655|GO:0046677|GO:0005739|GO:0008800|GO:0016787	226354_at	Hs.410388	114294	BE892574
ABAT	4-aminobutyrate aminotransferase	2.18162	down	GO:0007610|GO:0009448|GO:0009450|GO:0042135|GO:0042135|GO:0048148|GO:0005739|GO:0005739|GO:0005739|GO:0005759|GO:0032144|GO:0003824|GO:0003867|GO:0003867|GO:0008483|GO:0016740|GO:0030170|GO:0030170|GO:0032145|GO:0042803|GO:0047298	209460_at	Hs.336768	18	AF237813
ETFDH	electron-transferring-flavoprotein dehydrogenase	2.1681	down	GO:0006725|GO:0006810|GO:0055114|GO:0005624|GO:0005739|GO:0005743|GO:0005743|GO:0016020|GO:0016021|GO:0004174|GO:0004174|GO:0004497|GO:0005506|GO:0009054|GO:0016491|GO:0046872|GO:0051536|GO:0051539	205530_at	Hs.155729	2110	NM_004453
AGXT2L1	alanine-glyoxylate aminotransferase 2-like 1	2.13336	down	GO:0006520|GO:0005739|GO:0003824|GO:0008453|GO:0008483|GO:0016740|GO:0030170	221008_s_at	Hs.106576	64850	NM_031279
ETFDH	electron-transferring-flavoprotein dehydrogenase	2.09577	down	GO:0006725|GO:0006810|GO:0055114|GO:0005624|GO:0005739|GO:0005743|GO:0005743|GO:0016020|GO:0016021|GO:0004174|GO:0004174|GO:0004497|GO:0005506|GO:0009054|GO:0016491|GO:0046872|GO:0051536|GO:0051539	33494_at	Hs.155729	2110	S69232
ATP5S	ATP synthase, H+ transporting, mitochondrial F0 complex, subunit s (factor B)	2.09463	down	GO:0006810|GO:0006811|GO:0015992|GO:0015992|GO:0005739|GO:0005743|GO:0016020|GO:0045263|GO:0015078|GO:0015078	213995_at	Hs.438489	27109	AW195882
BNIP3L	BCL2/adenovirus E1B 19kDa interacting protein 3-like	2.08461	up	GO:0006915|GO:0006917|GO:0008634|GO:0043065|GO:0043066|GO:0051607|GO:0005634|GO:0005635|GO:0005635|GO:0005739|GO:0005739|GO:0005740|GO:0005783|GO:0005783|GO:0016020|GO:0016021|GO:0031224|GO:0005515|GO:0005521|GO:0042802|GO:0042803|GO:0046982	221479_s_at	Hs.131226	665	AF060922
GLS	glutaminase	2.07262	up	GO:0006541|GO:0006543|GO:0005739|GO:0005739|GO:0004359|GO:0004359|GO:0016787	203158_s_at	Hs.116448	2744	AF097493
AMACR /// C1QTNF3	alpha-methylacyl-CoA racemase /// C1q and tumor necrosis factor related protein 3	2.02982	down	GO:0006817|GO:0008152|GO:0005576|GO:0005737|GO:0005739|GO:0005739|GO:0005777|GO:0005777|GO:0003824|GO:0008111|GO:0016491|GO:0016853	209424_s_at	Hs.171929	114899 /// 23600	AI796120
MCART1	mitochondrial carrier triple repeat 1	2.00807	up	GO:0006810|GO:0005739|GO:0005743|GO:0016020|GO:0016021|GO:0005488	232092_at	Hs.645492	92014	AI268054
Supplementary table 3 The significantly changed genes involved in DNA binding, protein binding, kinase, and protein kinase activity
DNA binding	GO number :	0003677	Percentage of the total number of genes :			0.1002
Gene Symbol	Gene Title	Fold change([Myr] vs [CTL])	Regulation ([Myr] vs [CTL])	GO(Avadis)	Probe Set ID	Unigene (Avadis)	Entrez Gene	Representative Public ID
BHLHB2	basic helix-loop-helix domain containing, class B, 2	4.45582	up	GO:0006350|GO:0006355|GO:0006355|GO:0009649|GO:0045449|GO:0045892|GO:0048168|GO:0005634|GO:0005634|GO:0003677|GO:0003700|GO:0005515|GO:0016564|GO:0030528	201170_s_at	Hs.171825	8553	NM_003670
WDHD1	WD repeat and HMG-box DNA binding protein 1	3.64513	down	GO:0006355|GO:0005634|GO:0005654|GO:0005737|GO:0003677|GO:0003677	204728_s_at	Hs.385998	11169	NM_007086
HELLS	helicase, lymphoid-specific	3.42576	up	GO:0006346|GO:0006350|GO:0006355|GO:0007049|GO:0007067|GO:0007275|GO:0007275|GO:0010216|GO:0031508|GO:0046651|GO:0051301|GO:0000775|GO:0005634|GO:0005721|GO:0000166|GO:0003676|GO:0003677|GO:0004386|GO:0005524|GO:0016787	234040_at	Hs.655830	3070	AU150825
CALR	calreticulin	3.08073	down	GO:0006355|GO:0006457|GO:0006611|GO:0006874|GO:0030866|GO:0040020|GO:0042981|GO:0005576|GO:0005578|GO:0005615|GO:0005737|GO:0005783|GO:0005783|GO:0005788|GO:0005788|GO:0005829|GO:0009897|GO:0009986|GO:0003677|GO:0005509|GO:0005509|GO:0005515|GO:0005529|GO:0008270|GO:0046872|GO:0051082	200935_at	Hs.515162	811	NM_004343
WDHD1	WD repeat and HMG-box DNA binding protein 1	3.0324	down	GO:0006355|GO:0005634|GO:0005654|GO:0005737|GO:0003677|GO:0003677	216228_s_at	Hs.385998	11169	AK001538
HELLS	helicase, lymphoid-specific	2.92865	down	GO:0006346|GO:0006350|GO:0006355|GO:0007049|GO:0007067|GO:0007275|GO:0007275|GO:0010216|GO:0031508|GO:0046651|GO:0051301|GO:0000775|GO:0005634|GO:0005721|GO:0000166|GO:0003676|GO:0003677|GO:0004386|GO:0005524|GO:0016787	220085_at	Hs.655830	3070	NM_018063
HELLS	helicase, lymphoid-specific	2.8605	down	GO:0006346|GO:0006350|GO:0006355|GO:0007049|GO:0007067|GO:0007275|GO:0007275|GO:0010216|GO:0031508|GO:0046651|GO:0051301|GO:0000775|GO:0005634|GO:0005721|GO:0000166|GO:0003676|GO:0003677|GO:0004386|GO:0005524|GO:0016787	227350_at	Hs.655830	3070	AI889959
ATR	ataxia telangiectasia and Rad3 related	2.76053	down	GO:0000077|GO:0006281|GO:0006281|GO:0006974|GO:0006974|GO:0007049|GO:0007275|GO:0008156|GO:0005634|GO:0005694|GO:0003677|GO:0004672|GO:0004672|GO:0004674|GO:0005488|GO:0005515|GO:0016301|GO:0016740|GO:0016773|GO:0030145|GO:0032405|GO:0032407	209903_s_at	Hs.271791	545	U49844
HELLS	helicase, lymphoid-specific	2.73059	down	GO:0006346|GO:0006350|GO:0006355|GO:0007049|GO:0007067|GO:0007275|GO:0007275|GO:0010216|GO:0031508|GO:0046651|GO:0051301|GO:0000775|GO:0005634|GO:0005721|GO:0000166|GO:0003676|GO:0003677|GO:0004386|GO:0005524|GO:0016787	227349_at	Hs.655830	3070	AI807356
SOS1	son of sevenless homolog 1 (Drosophila)	2.65005	down	GO:0007165|GO:0007264|GO:0007265|GO:0035023|GO:0051056|GO:0005622|GO:0003677|GO:0005085|GO:0005088|GO:0005089|GO:0005089|GO:0005100|GO:0005515	227426_at	Hs.709893	6654	AV702692
THRB	thyroid hormone receptor, beta (erythroblastic leukemia viral (v-erb-a) oncogene homolog 2, avian)	2.59178	down	GO:0006350|GO:0006351|GO:0006355|GO:0007605|GO:0005634|GO:0005634|GO:0003677|GO:0003677|GO:0003700|GO:0003700|GO:0003707|GO:0003714|GO:0004872|GO:0004879|GO:0004887|GO:0004887|GO:0005515|GO:0008270|GO:0043565|GO:0046872	228716_at	Hs.187861	7068	BG494007
KLF3	Kruppel-like factor 3 (basic)	2.56577	down	GO:0000122|GO:0006350|GO:0006355|GO:0007275|GO:0005622|GO:0005634|GO:0003676|GO:0003677|GO:0003700|GO:0008270|GO:0046872	225133_at	Hs.298658	51274	AA130132
XRN1	5'-3' exoribonuclease 1	2.54225	down	GO:0007049|GO:0045786|GO:0005622|GO:0005737|GO:0003676|GO:0003677|GO:0003723|GO:0004518|GO:0004527|GO:0005515|GO:0016787	225814_at	Hs.435103	54464	BG534738
KIAA1305	KIAA1305	2.50429	down	GO:0015074|GO:0016020|GO:0016021|GO:0003676|GO:0003677	220911_s_at	Hs.288348	57523	NM_025081
BHLHB2	basic helix-loop-helix domain containing, class B, 2	2.44181	up	GO:0006350|GO:0006355|GO:0006355|GO:0009649|GO:0045449|GO:0045892|GO:0048168|GO:0005634|GO:0005634|GO:0003677|GO:0003700|GO:0005515|GO:0016564|GO:0030528	201169_s_at	Hs.171825	8553	BG326045
PHTF1	putative homeodomain transcription factor 1	2.42746	down	GO:0006350|GO:0006355|GO:0005634|GO:0003677|GO:0003700	210191_s_at	Hs.655824	10745	BC002447
STOX1	storkhead box 1	2.41669	down	GO:0005634|GO:0005737|GO:0003677	1553202_at	Hs.37636	219736	NM_152709
RAD50	RAD50 homolog (S. cerevisiae)	2.41626	down	GO:0000019|GO:0006259|GO:0006281|GO:0006281|GO:0006302|GO:0006302|GO:0006310|GO:0006974|GO:0007004|GO:0007049|GO:0007126|GO:0007131|GO:0000781|GO:0005634|GO:0005694|GO:0030870|GO:0030870|GO:0030870|GO:0000014|GO:0000166|GO:0003677|GO:0004518|GO:0005515|GO:0005524|GO:0008270|GO:0008408|GO:0016787|GO:0030674|GO:0046872	208393_s_at	Hs.655835	10111	NM_005732
SSBP3	single stranded DNA binding protein 3	2.38663	down	GO:0006350|GO:0006355|GO:0005634|GO:0003677|GO:0003697|GO:0030528	223635_s_at	Hs.658676	23648	BC003605
KLF4	Kruppel-like factor 4 (gut)	2.38658	up	GO:0006350|GO:0006355|GO:0007500|GO:0008285|GO:0045892|GO:0045892|GO:0005622|GO:0005634|GO:0003676|GO:0003677|GO:0003700|GO:0003700|GO:0008270|GO:0008270|GO:0016563|GO:0016564|GO:0016564|GO:0046872	221841_s_at	Hs.376206	9314	BF514079
WDHD1	WD repeat and HMG-box DNA binding protein 1	2.36755	down	GO:0006355|GO:0005634|GO:0005654|GO:0005737|GO:0003677|GO:0003677	204727_at	Hs.385998	11169	AW772140
NFATC2	Nuclear factor of activated T-cells, cytoplasmic, calcineurin-dependent 2	2.36028	down	GO:0006350|GO:0006355|GO:0006355|GO:0045449|GO:0045941|GO:0005634|GO:0005634|GO:0005737|GO:0005737|GO:0003677|GO:0003677|GO:0003700|GO:0003700|GO:0005515|GO:0016563	226991_at	Hs.356321	4773	AA489681
ZNF280D	zinc finger protein 280D	2.35933	down	GO:0006350|GO:0006355|GO:0005622|GO:0005634|GO:0003676|GO:0003677|GO:0008270|GO:0046872	221213_s_at	Hs.511477	54816	NM_017661
XRN1	5'-3' exoribonuclease 1	2.30737	down	GO:0007049|GO:0045786|GO:0005622|GO:0005737|GO:0003676|GO:0003677|GO:0003723|GO:0004518|GO:0004527|GO:0005515|GO:0016787	1555785_a_at	Hs.435103	54464	AY137776
GRLF1	glucocorticoid receptor DNA binding factor 1	2.29909	down	GO:0001843|GO:0006350|GO:0006350|GO:0006355|GO:0007049|GO:0007165|GO:0007264|GO:0008360|GO:0016481|GO:0030900|GO:0043010|GO:0045786|GO:0005622|GO:0005634|GO:0005634|GO:0005737|GO:0015629|GO:0000166|GO:0003677|GO:0003677|GO:0003714|GO:0004872|GO:0005096|GO:0005525|GO:0016564	229394_s_at	Hs.509447	2909	AI275597
JUN	Jun oncogene	2.27659	up	GO:0006350|GO:0006355|GO:0009987|GO:0031953|GO:0035026|GO:0045449|GO:0045944|GO:0000228|GO:0005634|GO:0005667|GO:0003677|GO:0003677|GO:0003700|GO:0003700|GO:0003702|GO:0005515|GO:0043565|GO:0046983	213281_at	Hs.525704	3725	BE327172
EGR1	early growth response 1	2.27188	up	GO:0000122|GO:0006350|GO:0006355|GO:0007611|GO:0030217|GO:0045941|GO:0045944|GO:0005622|GO:0005634|GO:0005634|GO:0003676|GO:0003677|GO:0003677|GO:0003700|GO:0003700|GO:0008270|GO:0016563|GO:0046872	201693_s_at	Hs.326035	1958	AV733950
ATR	ataxia telangiectasia and Rad3 related	2.27023	down	GO:0000077|GO:0006281|GO:0006281|GO:0006974|GO:0006974|GO:0007049|GO:0007275|GO:0008156|GO:0005634|GO:0005694|GO:0003677|GO:0004672|GO:0004672|GO:0004674|GO:0005488|GO:0005515|GO:0016301|GO:0016740|GO:0016773|GO:0030145|GO:0032405|GO:0032407	209902_at	Hs.271791	545	U49844
SYNE2	spectrin repeat containing, nuclear envelope 2	2.26946	down	GO:0006350|GO:0006355|GO:0006355|GO:0007165|GO:0007267|GO:0030308|GO:0030520|GO:0005634|GO:0005634|GO:0005737|GO:0005739|GO:0016020|GO:0016021|GO:0031965|GO:0003677|GO:0003677|GO:0003700|GO:0003700|GO:0003707|GO:0003707|GO:0003713|GO:0003779|GO:0004872|GO:0004879|GO:0004879|GO:0005198|GO:0005496|GO:0005496|GO:0005515|GO:0008270|GO:0008289|GO:0030284|GO:0043565|GO:0046872|GO:0048019	202761_s_at	Hs.525392	23224	NM_015180
JUN	jun oncogene	2.25105	up	GO:0006350|GO:0006355|GO:0009987|GO:0031953|GO:0035026|GO:0045449|GO:0045944|GO:0000228|GO:0005634|GO:0005667|GO:0003677|GO:0003677|GO:0003700|GO:0003700|GO:0003702|GO:0005515|GO:0043565|GO:0046983	201464_x_at	Hs.525704	3725	BG491844
THRB	thyroid hormone receptor, beta (erythroblastic leukemia viral (v-erb-a) oncogene homolog 2, avian)	2.24229	down	GO:0006350|GO:0006351|GO:0006355|GO:0007605|GO:0005634|GO:0005634|GO:0003677|GO:0003677|GO:0003700|GO:0003700|GO:0003707|GO:0003714|GO:0004872|GO:0004879|GO:0004887|GO:0004887|GO:0005515|GO:0008270|GO:0043565|GO:0046872	229657_at	Hs.187861	7068	BF431989
HNRPDL	heterogeneous nuclear ribonucleoprotein D-like	2.21058	down	GO:0006350|GO:0006355|GO:0006396|GO:0005634|GO:0005634|GO:0005737|GO:0030530|GO:0000166|GO:0003676|GO:0003677|GO:0003690|GO:0003697|GO:0003723|GO:0005515|GO:0008143	209067_s_at	Hs.527105	9987	D89092
HELLS	helicase, lymphoid-specific	2.20792	down	GO:0006346|GO:0006350|GO:0006355|GO:0007049|GO:0007067|GO:0007275|GO:0007275|GO:0010216|GO:0031508|GO:0046651|GO:0051301|GO:0000775|GO:0005634|GO:0005721|GO:0000166|GO:0003676|GO:0003677|GO:0004386|GO:0005524|GO:0016787	223556_at	Hs.655830	3070	AF155827
CALR	calreticulin	2.18068	down	GO:0006355|GO:0006457|GO:0006611|GO:0006874|GO:0030866|GO:0040020|GO:0042981|GO:0005576|GO:0005578|GO:0005615|GO:0005737|GO:0005783|GO:0005783|GO:0005788|GO:0005788|GO:0005829|GO:0009897|GO:0009986|GO:0003677|GO:0005509|GO:0005509|GO:0005515|GO:0005529|GO:0008270|GO:0046872|GO:0051082	214315_x_at	Hs.515162	811	AI348935
ZFX	zinc finger protein, X-linked	2.17921	down	GO:0006350|GO:0006355|GO:0045449|GO:0005622|GO:0005634|GO:0003676|GO:0003677|GO:0003677|GO:0003713|GO:0008270|GO:0030528|GO:0046872	229022_at	Hs.336681	7543	AI745209
ZBTB20	zinc finger and BTB domain containing 20	2.15388	down	GO:0006350|GO:0006355|GO:0005622|GO:0005634|GO:0003676|GO:0003677|GO:0005515|GO:0008270|GO:0046872	222357_at	Hs.655108	26137	AW974823
MAZ	MYC-associated zinc finger protein (purine-binding transcription factor)	2.14037	down	GO:0006350|GO:0006355|GO:0006367|GO:0006369|GO:0005622|GO:0005634|GO:0003676|GO:0003677|GO:0003702|GO:0003723|GO:0008270|GO:0046872	207824_s_at	Hs.23650	4150	NM_002383
XRN1	5'-3' exoribonuclease 1	2.13059	down	GO:0007049|GO:0045786|GO:0005622|GO:0005737|GO:0003676|GO:0003677|GO:0003723|GO:0004518|GO:0004527|GO:0005515|GO:0016787	233632_s_at	Hs.435103	54464	AL117516
MAFF	v-maf musculoaponeurotic fibrosarcoma oncogene homolog F (avian)	2.12556	up	GO:0001701|GO:0006350|GO:0006355|GO:0006366|GO:0006950|GO:0007567|GO:0045449|GO:0045604|GO:0005634|GO:0003677|GO:0003700|GO:0043565|GO:0046983	36711_at	Hs.517617	23764	AL021977
SLC2A4RG	SLC2A4 regulator	2.12257	down	GO:0006350|GO:0006355|GO:0006355|GO:0005622|GO:0005634|GO:0005634|GO:0005737|GO:0003676|GO:0003677|GO:0003700|GO:0008270|GO:0046872	222650_s_at	Hs.435126	56731	BE898559
SLC2A4RG	SLC2A4 regulator	2.11704	down	GO:0006350|GO:0006355|GO:0006355|GO:0005622|GO:0005634|GO:0005634|GO:0005737|GO:0003676|GO:0003677|GO:0003700|GO:0008270|GO:0046872	218494_s_at	Hs.435126	56731	NM_020062
ZKSCAN1	zinc finger with KRAB and SCAN domains 1	2.1128	down	GO:0006350|GO:0006355|GO:0006355|GO:0005622|GO:0005634|GO:0005634|GO:0003676|GO:0003677|GO:0003700|GO:0003700|GO:0008270|GO:0046872	1557953_at	Hs.615360	7586	BG761185
LOC100131851 /// LOC100134497 /// LOC401002 /// LOC646674 /// SSBP3	single stranded DNA binding protein 3 /// similar to single stranded DNA binding protein 3 /// hypothetical LOC646674 /// hypothetical protein LOC100131851 /// hypothetical protein LOC100134497	2.11005	down	GO:0006350|GO:0006355|GO:0005634|GO:0003677|GO:0003697|GO:0030528	222482_at	Hs.658676	100131851 /// 100134497 /// 23648 /// 401002 /// 646674	AA102468
FOXP4	forkhead box P4	2.10924	down	GO:0006350|GO:0006355|GO:0005622|GO:0005634|GO:0003676|GO:0003677|GO:0003700|GO:0008270|GO:0043565|GO:0046872	227120_at	Hs.131436	116113	AI673539
HNRNPD	heterogeneous nuclear ribonucleoprotein D (AU-rich element RNA binding protein 1, 37kDa)	2.10298	down	GO:0006350|GO:0006355|GO:0006355|GO:0006396|GO:0006401|GO:0000781|GO:0005634|GO:0005634|GO:0005634|GO:0005694|GO:0030529|GO:0030530|GO:0000166|GO:0003676|GO:0003677|GO:0003723|GO:0003723|GO:0003723|GO:0005515|GO:0016563	209330_s_at	Hs.480073	3184	D55674
ATRX	alpha thalassemia/mental retardation syndrome X-linked (RAD54 homolog, S. cerevisiae)	2.10018	down	GO:0006281|GO:0006281|GO:0006306|GO:0006310|GO:0006355|GO:0006974|GO:0007605|GO:0005634|GO:0005634|GO:0005720|GO:0000166|GO:0003676|GO:0003677|GO:0003678|GO:0003700|GO:0004386|GO:0004386|GO:0005515|GO:0005515|GO:0005524|GO:0008270|GO:0016787|GO:0046872	208859_s_at	Hs.533526	546	AI650257
SMARCA4	SWI/SNF related, matrix associated, actin dependent regulator of chromatin, subfamily a, member 4	2.09605	down	GO:0000122|GO:0001832|GO:0001835|GO:0006346|GO:0006350|GO:0006355|GO:0006357|GO:0007403|GO:0030900|GO:0030902|GO:0000792|GO:0005634|GO:0005634|GO:0005654|GO:0000166|GO:0003676|GO:0003677|GO:0003682|GO:0003700|GO:0003713|GO:0004386|GO:0004386|GO:0005515|GO:0005524|GO:0008134|GO:0016787|GO:0042802|GO:0047485	212520_s_at	Hs.327527	6597	AI684141
VDR	vitamin D (1,25- dihydroxyvitamin D3) receptor	2.08164	down	GO:0001501|GO:0006350|GO:0006355|GO:0006816|GO:0006874|GO:0007165|GO:0007275|GO:0009887|GO:0016481|GO:0050892|GO:0005634|GO:0003677|GO:0003677|GO:0003677|GO:0003700|GO:0003707|GO:0004872|GO:0004879|GO:0005515|GO:0005515|GO:0008270|GO:0008434|GO:0043565|GO:0046872	204255_s_at	Hs.524368	7421	AA772285
DENND4A	DENN/MADD domain containing 4A	2.07362	down	GO:0006350|GO:0006355|GO:0006355|GO:0005634|GO:0005634|GO:0003677|GO:0003677|GO:0005515	214787_at	Hs.654567	10260	BE268538
KIAA2018	KIAA2018	2.07096	down	GO:0045449|GO:0005634|GO:0016020|GO:0003677|GO:0004571|GO:0005509|GO:0030528	227435_at	Hs.632570	205717	AI962192
RORA	RAR-related orphan receptor A	2.06911	up	GO:0006350|GO:0006355|GO:0007165|GO:0045944|GO:0005634|GO:0003677|GO:0003700|GO:0003700|GO:0003707|GO:0004872|GO:0004879|GO:0004879|GO:0005515|GO:0008270|GO:0043565|GO:0046872	210479_s_at	Hs.695914	6095	L14611
ARID1A	AT rich interactive domain 1A (SWI-like)	2.06543	down	GO:0006350|GO:0006355|GO:0016568|GO:0030520|GO:0030521|GO:0042766|GO:0042921|GO:0048096|GO:0005622|GO:0005634|GO:0005634|GO:0016514|GO:0003677|GO:0003677|GO:0003677|GO:0005515|GO:0005515|GO:0016563	210649_s_at	Hs.468972	8289	AF231056
KLF5	Kruppel-like factor 5 (intestinal)	2.05755	up	GO:0001525|GO:0006350|GO:0006355|GO:0006366|GO:0008284|GO:0030033|GO:0045941|GO:0005622|GO:0005634|GO:0003676|GO:0003677|GO:0003700|GO:0003702|GO:0005515|GO:0008270|GO:0046872	209211_at	Hs.508234	688	AF132818
FOS	v-fos FBJ murine osteosarcoma viral oncogene homolog	2.04645	up	GO:0006306|GO:0006355|GO:0006357|GO:0006954|GO:0007399|GO:0045449|GO:0005634|GO:0005634|GO:0005667|GO:0003677|GO:0003690|GO:0003700|GO:0003704|GO:0005515|GO:0043565|GO:0046982|GO:0046983	209189_at	Hs.25647	2353	BC004490
NR2F2	nuclear receptor subfamily 2, group F, member 2	2.04096	down	GO:0001764|GO:0006350|GO:0006355|GO:0006357|GO:0006629|GO:0007165|GO:0009952|GO:0009956|GO:0030900|GO:0048514|GO:0005634|GO:0005634|GO:0003677|GO:0003700|GO:0003706|GO:0003707|GO:0003714|GO:0004872|GO:0004879|GO:0004879|GO:0008270|GO:0043565|GO:0046872	209121_x_at	Hs.701977	7026	M64497
PDCD6	Aryl-hydrocarbon receptor repressor	2.03713	down	GO:0006350|GO:0006355|GO:0006915|GO:0007165|GO:0008624|GO:0045449|GO:0051592|GO:0005634|GO:0005634|GO:0005783|GO:0005783|GO:0005789|GO:0016020|GO:0003677|GO:0004871|GO:0004872|GO:0005509|GO:0005509|GO:0030528|GO:0048306	222380_s_at	Hs.50823	10016	AI907083
RCOR3	REST corepressor 3	2.02877	up	GO:0006350|GO:0006355|GO:0005634|GO:0003677|GO:0005515	218344_s_at	Hs.696152	55758	NM_018254
ZSCAN16	zinc finger and SCAN domain containing 16	2.02866	down	GO:0006350|GO:0006355|GO:0005622|GO:0005634|GO:0003676|GO:0003677|GO:0003700|GO:0008270|GO:0046872	219676_at	Hs.656641	80345	NM_025231
ARNTL2	aryl hydrocarbon receptor nuclear translocator-like 2	2.02616	down	GO:0006350|GO:0006355|GO:0006355|GO:0007165|GO:0009649|GO:0045449|GO:0048511|GO:0005634|GO:0005634|GO:0003677|GO:0003700|GO:0004871|GO:0030528	223586_at		56938	AF256215
ZNF326	zinc finger protein 326	2.02581	down	GO:0006350|GO:0006355|GO:0005622|GO:0005634|GO:0016363|GO:0003677|GO:0008270|GO:0046872	241720_at	Hs.306221	284695	BG501875
ALB	albumin	2.01359	down	GO:0006810|GO:0006810|GO:0009267|GO:0019836|GO:0043066|GO:0043072|GO:0051659|GO:0005576|GO:0005576|GO:0005615|GO:0043234|GO:0003677|GO:0005504|GO:0005504|GO:0005507|GO:0005507|GO:0005515|GO:0008144|GO:0008144|GO:0008289|GO:0015643|GO:0016209|GO:0019825|GO:0030170|GO:0046872	211298_s_at	Hs.418167	213	AF116645
BAZ2B	bromodomain adjacent to zinc finger domain, 2B	2.00797	down	GO:0006350|GO:0006355|GO:0005634|GO:0003677|GO:0005515|GO:0008270|GO:0046872	203080_s_at	Hs.470369	29994	NM_013450
protein binding	GO number :	0005515	Percentage of the total number of genes :			0.273
Gene Symbol	Gene Title	Fold change([Myr] vs [CTL])	Regulation ([Myr] vs [CTL])	GO(Avadis)	Probe Set ID	Unigene (Avadis)	Entrez Gene	Representative Public ID
SERPINE1	serpin peptidase inhibitor, clade E (nexin, plasminogen activator inhibitor type 1), member 1	5.99709	up	GO:0007596|GO:0042730|GO:0045765|GO:0005576|GO:0005576|GO:0002020|GO:0004866|GO:0004867|GO:0005515|GO:0005515|GO:0008243	202627_s_at	Hs.414795	5054	AL574210
ARHGAP26	Rho GTPase activating protein 26	4.57794	down	GO:0007165|GO:0007399|GO:0030036|GO:0005622|GO:0005096|GO:0005100|GO:0005515	226576_at	Hs.654668	23092	AI768563
BHLHB2	basic helix-loop-helix domain containing, class B, 2	4.45582	up	GO:0006350|GO:0006355|GO:0006355|GO:0009649|GO:0045449|GO:0045892|GO:0048168|GO:0005634|GO:0005634|GO:0003677|GO:0003700|GO:0005515|GO:0016564|GO:0030528	201170_s_at	Hs.171825	8553	NM_003670
SERPINE1	serpin peptidase inhibitor, clade E (nexin, plasminogen activator inhibitor type 1), member 1	4.43093	up	GO:0007596|GO:0042730|GO:0045765|GO:0005576|GO:0005576|GO:0002020|GO:0004866|GO:0004867|GO:0005515|GO:0005515|GO:0008243	202628_s_at	Hs.414795	5054	NM_000602
DMXL1	Dmx-like 1	4.3746	down	GO:0005515	203791_at	Hs.181042	1657	NM_005509
DIDO1	death inducer-obliterator 1	4.27138	down	GO:0006350|GO:0006915|GO:0005634|GO:0005737|GO:0005515|GO:0008270|GO:0046872	227335_at	Hs.517172	11083	AW664953
NCF2	neutrophil cytosolic factor 2 (65kDa, chronic granulomatous disease, autosomal 2)	4.26666	up	GO:0006801|GO:0006968|GO:0001669|GO:0005625|GO:0005737|GO:0005829|GO:0005488|GO:0005515|GO:0008022|GO:0009055	209949_at	Hs.587558	4688	BC001606
FST	follistatin	4.22049	up	GO:0000122|GO:0007275|GO:0046882|GO:0051798|GO:0005576|GO:0005576|GO:0005515|GO:0017106	226847_at	Hs.9914	10468	BF438173
RHOBTB3	Rho-related BTB domain containing 3	4.20306	down	GO:0008104|GO:0005604|GO:0003924|GO:0005515	216048_s_at	Hs.445030	22836	AK023621
NDRG1	N-myc downstream regulated gene 1	3.76673	up	GO:0010038|GO:0005634|GO:0005737|GO:0005886|GO:0016020|GO:0005515	200632_s_at	Hs.372914	10397	NM_006096
SORBS2	sorbin and SH3 domain containing 2	3.70537	down	GO:0005622|GO:0005634|GO:0005634|GO:0015629|GO:0030018|GO:0003676|GO:0005200|GO:0005515|GO:0008093|GO:0008270|GO:0008307	204288_s_at	Hs.655143	8470	NM_021069
GIPC2	GIPC PDZ domain containing family, member 2	3.68014	down	GO:0005737|GO:0005515	236548_at	Hs.659356	54810	AL044570
SORBS2	sorbin and SH3 domain containing 2	3.46513	down	GO:0000059|GO:0006606|GO:0006810|GO:0006886|GO:0015031|GO:0005622|GO:0005634|GO:0005634|GO:0005634|GO:0005643|GO:0005737|GO:0005737|GO:0015629|GO:0030018|GO:0003676|GO:0005200|GO:0005488|GO:0005515|GO:0005515|GO:0008093|GO:0008270|GO:0008307|GO:0008536|GO:0008565|GO:0008565|GO:0042393|GO:0042393	225728_at	Hs.655143	8470	AI659533
HSPA1A /// HSPA1B	heat shock 70kDa protein 1A /// heat shock 70kDa protein 1B	3.34546	up	GO:0006402|GO:0006916|GO:0006950|GO:0006986|GO:0005634|GO:0005737|GO:0005739|GO:0005783|GO:0000166|GO:0005515|GO:0005524|GO:0051082	200799_at	Hs.520028	3303 /// 3304	NM_005345
PALLD	palladin, cytoskeletal associated protein	3.32471	up	GO:0007010|GO:0009296|GO:0005634|GO:0005737|GO:0005856|GO:0005884|GO:0009424|GO:0003774|GO:0003779|GO:0005515|GO:0051371	200897_s_at	Hs.151220	23022	NM_016081
HSPA1A /// HSPA1B	heat shock 70kDa protein 1A /// heat shock 70kDa protein 1B	3.24284	up	GO:0006402|GO:0006916|GO:0006950|GO:0006986|GO:0005634|GO:0005737|GO:0005739|GO:0005783|GO:0000166|GO:0005515|GO:0005524|GO:0051082	200800_s_at	Hs.520028	3303 /// 3304	NM_005345
CALR	calreticulin	3.08073	down	GO:0006355|GO:0006457|GO:0006611|GO:0006874|GO:0030866|GO:0040020|GO:0042981|GO:0005576|GO:0005578|GO:0005615|GO:0005737|GO:0005783|GO:0005783|GO:0005788|GO:0005788|GO:0005829|GO:0009897|GO:0009986|GO:0003677|GO:0005509|GO:0005509|GO:0005515|GO:0005529|GO:0008270|GO:0046872|GO:0051082	200935_at	Hs.515162	811	NM_004343
IFT88	intraflagellar transport 88 homolog (Chlamydomonas)	3.04286	down	GO:0007224|GO:0007368|GO:0007588|GO:0009887|GO:0009952|GO:0009953|GO:0042487|GO:0042733|GO:0045862|GO:0048598|GO:0005930|GO:0005932|GO:0019861|GO:0005488|GO:0005515	204703_at	Hs.187376	8100	NM_006531
TINAG	tubulointerstitial nephritis antigen	3.0218	up	GO:0006508|GO:0007155|GO:0007155|GO:0007443|GO:0005576|GO:0005578|GO:0005604|GO:0005604|GO:0000166|GO:0004197|GO:0004197|GO:0005515|GO:0005515|GO:0008234	240480_at	Hs.127011	27283	AI253162
HSPA4L	heat shock 70kDa protein 4-like	3.0086	down	GO:0006457|GO:0006950|GO:0006986|GO:0006986|GO:0005634|GO:0005634|GO:0005737|GO:0005737|GO:0000166|GO:0005515|GO:0005524|GO:0005524	205543_at	Hs.135554	22824	NM_014278
HMOX1	heme oxygenase (decycling) 1	3.00105	up	GO:0001525|GO:0001666|GO:0006788|GO:0006979|GO:0007264|GO:0008217|GO:0008285|GO:0008630|GO:0031670|GO:0032764|GO:0042167|GO:0043123|GO:0043305|GO:0043392|GO:0043433|GO:0043627|GO:0045768|GO:0050896|GO:0005624|GO:0005634|GO:0005730|GO:0005783|GO:0005783|GO:0005792|GO:0005829|GO:0004392|GO:0004392|GO:0004630|GO:0004871|GO:0005506|GO:0005515|GO:0016491|GO:0020037|GO:0046872	203665_at	Hs.517581	3162	NM_002133
FGFR3	fibroblast growth factor receptor 3 (achondroplasia, thanatophoric dwarfism)	2.97995	down	GO:0000165|GO:0001501|GO:0006468|GO:0007259|GO:0007605|GO:0008543|GO:0016049|GO:0005887|GO:0016020|GO:0016021|GO:0016021|GO:0000166|GO:0004672|GO:0004713|GO:0004714|GO:0004872|GO:0005007|GO:0005007|GO:0005515|GO:0005524|GO:0016301|GO:0016740|GO:0042802	204380_s_at	Hs.1420	2261	M58051
HSPA1A /// HSPA1B	heat shock 70kDa protein 1A /// heat shock 70kDa protein 1B	2.97595	up	GO:0006402|GO:0006916|GO:0006950|GO:0006986|GO:0005634|GO:0005737|GO:0005739|GO:0005783|GO:0000166|GO:0005515|GO:0005524|GO:0051082	202581_at	Hs.520028	3303 /// 3304	NM_005346
NTN4	netrin 4	2.95025	down	GO:0005576|GO:0005578|GO:0005604|GO:0005515	223315_at	Hs.201034	59277	AF278532
PEX3	peroxisomal biogenesis factor 3	2.90379	down	GO:0007031|GO:0007031|GO:0045046|GO:0005777|GO:0005777|GO:0005777|GO:0005778|GO:0005779|GO:0005779|GO:0016020|GO:0016021|GO:0005515	203972_s_at	Hs.7277	8504	AB035307
TDRD7	tudor domain containing 7	2.80557	down	GO:0005737|GO:0005759|GO:0003676|GO:0005515|GO:0047485	213361_at	Hs.193842	23424	AW129593
ATR	ataxia telangiectasia and Rad3 related	2.76053	down	GO:0000077|GO:0006281|GO:0006281|GO:0006974|GO:0006974|GO:0007049|GO:0007275|GO:0008156|GO:0005634|GO:0005694|GO:0003677|GO:0004672|GO:0004672|GO:0004674|GO:0005488|GO:0005515|GO:0016301|GO:0016740|GO:0016773|GO:0030145|GO:0032405|GO:0032407	209903_s_at	Hs.271791	545	U49844
GIPC2	GIPC PDZ domain containing family, member 2	2.73153	down	GO:0005737|GO:0005515	219970_at	Hs.659356	54810	NM_017655
SLC22A3	solute carrier family 22 (extraneuronal monoamine transporter), member 3	2.72805	down	GO:0006810|GO:0006811|GO:0015695|GO:0015695|GO:0015697|GO:0005624|GO:0005887|GO:0016020|GO:0016021|GO:0005215|GO:0005515|GO:0015075|GO:0015101|GO:0015101|GO:0015651	205421_at	Hs.567337	6581	NM_021977
PEX3	peroxisomal biogenesis factor 3	2.72702	down	GO:0007031|GO:0007031|GO:0045046|GO:0005777|GO:0005777|GO:0005777|GO:0005778|GO:0005779|GO:0005779|GO:0016020|GO:0016021|GO:0005515	203970_s_at	Hs.7277	8504	NM_003630
PDZK1	PDZ domain containing 1	2.71249	down	GO:0008283|GO:0015893|GO:0005737|GO:0016020|GO:0005124|GO:0005215|GO:0005515|GO:0005515|GO:0008022|GO:0030165	205380_at	Hs.444751	5174	NM_002614
DLG7	discs, large homolog 7 (Drosophila)	2.70375	down	GO:0000087|GO:0000087|GO:0007049|GO:0007079|GO:0007267|GO:0008283|GO:0045842|GO:0005634|GO:0005634|GO:0005634|GO:0005737|GO:0031616|GO:0031616|GO:0004721|GO:0004721|GO:0005515	203764_at	Hs.77695	9787	NM_014750
SOS1	son of sevenless homolog 1 (Drosophila)	2.65005	down	GO:0007165|GO:0007264|GO:0007265|GO:0035023|GO:0051056|GO:0005622|GO:0003677|GO:0005085|GO:0005088|GO:0005089|GO:0005089|GO:0005100|GO:0005515	227426_at	Hs.709893	6654	AV702692
LRRC44	leucine rich repeat containing 44	2.64739	down	GO:0005515	235498_at	Hs.644625	127255	AI269596
NF1	neurofibromin 1 (neurofibromatosis, von Recklinghausen disease, Watson disease)	2.63889	up	GO:0000165|GO:0001649|GO:0001656|GO:0001666|GO:0001889|GO:0001937|GO:0001952|GO:0006469|GO:0007049|GO:0007154|GO:0007165|GO:0007265|GO:0007406|GO:0007420|GO:0007422|GO:0007507|GO:0008542|GO:0014044|GO:0014065|GO:0021510|GO:0021897|GO:0021987|GO:0022011|GO:0030036|GO:0030198|GO:0030199|GO:0030325|GO:0030336|GO:0032318|GO:0032320|GO:0032320|GO:0042060|GO:0042992|GO:0043065|GO:0043407|GO:0043409|GO:…	210631_at	Hs.113577	4763	D42072
HIP1	huntingtin interacting protein 1	2.62498	down	GO:0006897|GO:0006915|GO:0006919|GO:0042981|GO:0048268|GO:0005624|GO:0005737|GO:0005737|GO:0005794|GO:0005856|GO:0012505|GO:0016020|GO:0003779|GO:0005200|GO:0005488|GO:0005515|GO:0005543|GO:0030276	205426_s_at	Hs.329266	3092	U79734
BNIP3L	BCL2/adenovirus E1B 19kDa interacting protein 3-like	2.61177	up	GO:0006915|GO:0006917|GO:0008634|GO:0043065|GO:0043066|GO:0051607|GO:0005634|GO:0005635|GO:0005635|GO:0005739|GO:0005739|GO:0005740|GO:0005783|GO:0005783|GO:0016020|GO:0016021|GO:0031224|GO:0005515|GO:0005521|GO:0042802|GO:0042803|GO:0046982	221478_at	Hs.131226	665	AL132665
SPP1	secreted phosphoprotein 1 (osteopontin, bone sialoprotein I, early T-lymphocyte activation 1)	2.59448	up	GO:0001503|GO:0007155|GO:0005576|GO:0005615|GO:0005125|GO:0005515	209875_s_at	Hs.313	6696	M83248
GCLM	glutamate-cysteine ligase, modifier subunit	2.59329	up	GO:0006534|GO:0006536|GO:0006750|GO:0006750|GO:0006750|GO:0006979|GO:0035229|GO:0042493|GO:0043066|GO:0043524|GO:0050880|GO:0051409|GO:0051900|GO:0005625|GO:0005829|GO:0017109|GO:0004357|GO:0004357|GO:0004357|GO:0005515|GO:0016491|GO:0016874|GO:0035226|GO:0046982	203925_at	Hs.315562	2730	NM_002061
THRB	thyroid hormone receptor, beta (erythroblastic leukemia viral (v-erb-a) oncogene homolog 2, avian)	2.59178	down	GO:0006350|GO:0006351|GO:0006355|GO:0007605|GO:0005634|GO:0005634|GO:0003677|GO:0003677|GO:0003700|GO:0003700|GO:0003707|GO:0003714|GO:0004872|GO:0004879|GO:0004887|GO:0004887|GO:0005515|GO:0008270|GO:0043565|GO:0046872	228716_at	Hs.187861	7068	BG494007
SLC6A4	solute carrier family 6 (neurotransmitter transporter, serotonin), member 4	2.59144	down	GO:0001504|GO:0006810|GO:0006836|GO:0006837|GO:0015844|GO:0005887|GO:0005887|GO:0016020|GO:0016021|GO:0005328|GO:0005335|GO:0005515|GO:0008504|GO:0015222|GO:0015293	242009_at	Hs.591192	6532	AI082692
GCLM	glutamate-cysteine ligase, modifier subunit	2.58934	up	GO:0006534|GO:0006536|GO:0006750|GO:0006750|GO:0006750|GO:0006979|GO:0035229|GO:0042493|GO:0043066|GO:0043524|GO:0050880|GO:0051409|GO:0051900|GO:0005625|GO:0005829|GO:0017109|GO:0004357|GO:0004357|GO:0004357|GO:0005515|GO:0016491|GO:0016874|GO:0035226|GO:0046982	236140_at	Hs.315562	2730	AI753488
NEDD4L	neural precursor cell expressed, developmentally down-regulated 4-like	2.55058	down	GO:0006464|GO:0006512|GO:0006814|GO:0006883|GO:0007588|GO:0010038|GO:0016567|GO:0030104|GO:0042176|GO:0045807|GO:0005622|GO:0005622|GO:0005737|GO:0004842|GO:0004842|GO:0005515|GO:0005515|GO:0016874|GO:0017080	212448_at	Hs.185677	23327	AB007899
PALLD	palladin, cytoskeletal associated protein	2.54736	up	GO:0007010|GO:0009296|GO:0005634|GO:0005737|GO:0005856|GO:0005884|GO:0009424|GO:0003774|GO:0003779|GO:0005515|GO:0051371	200907_s_at	Hs.151220	23022	AU157932
RBL1	retinoblastoma-like 1 (p107)	2.5453	down	GO:0006350|GO:0006355|GO:0007049|GO:0016568|GO:0043550|GO:0045786|GO:0005634|GO:0005515	205296_at	Hs.207745	5933	AL365505
XRN1	5'-3' exoribonuclease 1	2.54225	down	GO:0007049|GO:0045786|GO:0005622|GO:0005737|GO:0003676|GO:0003677|GO:0003723|GO:0004518|GO:0004527|GO:0005515|GO:0016787	225814_at	Hs.435103	54464	BG534738
VAMP2	vesicle-associated membrane protein 2 (synaptobrevin 2)	2.52021	down	GO:0016192|GO:0005887|GO:0016020|GO:0016021|GO:0019717|GO:0030054|GO:0031410|GO:0045202|GO:0005515	201556_s_at	Hs.25348	6844	BC002737
STARD13	StAR-related lipid transfer (START) domain containing 13	2.49304	down	GO:0007049|GO:0007165|GO:0045786|GO:0005622|GO:0005737|GO:0005739|GO:0005811|GO:0012511|GO:0016020|GO:0005096|GO:0005515	213103_at	Hs.507704	90627	AA128023
ARHGDIA	Rho GDP dissociation inhibitor (GDI) alpha	2.48861	down	GO:0006916|GO:0006928|GO:0007162|GO:0007266|GO:0005737|GO:0005856|GO:0005094|GO:0005094|GO:0005096|GO:0005515|GO:0005515|GO:0042802	213606_s_at	Hs.159161	396	AI571798
NRP1	neuropilin 1	2.48792	down	GO:0001525|GO:0007155|GO:0007165|GO:0007267|GO:0007275|GO:0007399|GO:0007411|GO:0008284|GO:0009887|GO:0030154|GO:0005576|GO:0005624|GO:0005783|GO:0005886|GO:0016020|GO:0016021|GO:0004872|GO:0005021|GO:0005515	212298_at	Hs.131704	8829	BE620457
AP2A1	adaptor-related protein complex 2, alpha 1 subunit	2.478	down	GO:0006461|GO:0006810|GO:0006886|GO:0006886|GO:0006895|GO:0006897|GO:0006897|GO:0015031|GO:0016192|GO:0005794|GO:0016020|GO:0030117|GO:0030122|GO:0030130|GO:0030131|GO:0031410|GO:0005488|GO:0005515|GO:0008565	234068_s_at	Hs.467125	160	AC006942
RHOBTB1	Rho-related BTB domain containing 1	2.47104	down	GO:0007264|GO:0005622|GO:0000166|GO:0005515|GO:0005525	212651_at	Hs.148670	9886	AB018283
PFKFB3	6-phosphofructo-2-kinase/fructose-2,6-biphosphatase 3	2.46297	up	GO:0006003|GO:0006003|GO:0008152|GO:0000166|GO:0003824|GO:0003873|GO:0003873|GO:0004331|GO:0004331|GO:0005515|GO:0005524|GO:0016301|GO:0016740|GO:0016787|GO:0042802	202464_s_at	Hs.195471	5209	NM_004566
SQSTM1	sequestosome 1	2.44948	up	GO:0006511|GO:0006915|GO:0006950|GO:0006955|GO:0007242|GO:0008104|GO:0016197|GO:0030154|GO:0043122|GO:0043122|GO:0045944|GO:0005634|GO:0005737|GO:0005768|GO:0005770|GO:0005829|GO:0005829|GO:0005515|GO:0005515|GO:0008270|GO:0019901|GO:0019901|GO:0030971|GO:0042169|GO:0042169|GO:0043130|GO:0043130|GO:0046872	213112_s_at	Hs.437277	8878	N30649
RHOBTB3	Rho-related BTB domain containing 3	2.44469	down	GO:0008104|GO:0005604|GO:0003924|GO:0005515	202975_s_at	Hs.445030	22836	N21138
PEX1	peroxisome biogenesis factor 1	2.44193	down	GO:0006625|GO:0006810|GO:0007031|GO:0007031|GO:0015031|GO:0016558|GO:0060152|GO:0005737|GO:0005737|GO:0005777|GO:0005777|GO:0005778|GO:0005778|GO:0005829|GO:0016020|GO:0000166|GO:0005488|GO:0005515|GO:0005515|GO:0005524|GO:0005524|GO:0008022|GO:0017111|GO:0032403|GO:0042623	204873_at	Hs.164682	5189	NM_000466
BHLHB2	basic helix-loop-helix domain containing, class B, 2	2.44181	up	GO:0006350|GO:0006355|GO:0006355|GO:0009649|GO:0045449|GO:0045892|GO:0048168|GO:0005634|GO:0005634|GO:0003677|GO:0003700|GO:0005515|GO:0016564|GO:0030528	201169_s_at	Hs.171825	8553	BG326045
JAG1	jagged 1 (Alagille syndrome)	2.44104	up	GO:0001525|GO:0001709|GO:0002011|GO:0007154|GO:0007219|GO:0007219|GO:0007275|GO:0007275|GO:0007399|GO:0009887|GO:0030097|GO:0030216|GO:0030334|GO:0042127|GO:0042491|GO:0045445|GO:0045446|GO:0045596|GO:0045639|GO:0045747|GO:0048839|GO:0005576|GO:0005886|GO:0005887|GO:0016020|GO:0016020|GO:0016021|GO:0005112|GO:0005112|GO:0005198|GO:0005509|GO:0005509|GO:0005515|GO:0008083	209098_s_at	Hs.224012	182	U61276
RASSF4	Ras association (RalGDS/AF-6) domain family member 4	2.43854	down	GO:0007049|GO:0007165|GO:0045786|GO:0005515	226436_at	Hs.522895	83937	N49935
RAD50	RAD50 homolog (S. cerevisiae)	2.41626	down	GO:0000019|GO:0006259|GO:0006281|GO:0006281|GO:0006302|GO:0006302|GO:0006310|GO:0006974|GO:0007004|GO:0007049|GO:0007126|GO:0007131|GO:0000781|GO:0005634|GO:0005694|GO:0030870|GO:0030870|GO:0030870|GO:0000014|GO:0000166|GO:0003677|GO:0004518|GO:0005515|GO:0005524|GO:0008270|GO:0008408|GO:0016787|GO:0030674|GO:0046872	208393_s_at	Hs.655835	10111	NM_005732
CD36	CD36 molecule (thrombospondin receptor)	2.41039	down	GO:0006629|GO:0006631|GO:0006810|GO:0007155|GO:0007155|GO:0007596|GO:0005624|GO:0005887|GO:0016020|GO:0016021|GO:0004872|GO:0005515	209555_s_at	Hs.120949	948	M98399
EPPK1	epiplakin 1	2.40732	down	GO:0005737|GO:0005856|GO:0005856|GO:0005198|GO:0005198|GO:0005515	232164_s_at	Hs.200412	83481	AL137725
TINAG	tubulointerstitial nephritis antigen	2.40419	up	GO:0006508|GO:0007155|GO:0007155|GO:0007443|GO:0005576|GO:0005578|GO:0005604|GO:0005604|GO:0000166|GO:0004197|GO:0004197|GO:0005515|GO:0005515|GO:0008234	231154_x_at	Hs.127011	27283	BF000045
FBXO4	F-box protein 4	2.39743	down	GO:0006512|GO:0016567|GO:0000151|GO:0004842|GO:0005515	223493_at	Hs.165575	26272	AF129534
HIP1	huntingtin interacting protein 1	2.39103	down	GO:0006897|GO:0006915|GO:0006919|GO:0042981|GO:0048268|GO:0005624|GO:0005737|GO:0005737|GO:0005794|GO:0005856|GO:0012505|GO:0016020|GO:0003779|GO:0005200|GO:0005488|GO:0005515|GO:0005543|GO:0030276	205425_at	Hs.329266	3092	NM_005338
2009-09-09	septin 9	2.38189	down	GO:0005975|GO:0007049|GO:0045786|GO:0051291|GO:0051301|GO:0001725|GO:0005737|GO:0005874|GO:0005886|GO:0016020|GO:0048471|GO:0000166|GO:0003924|GO:0005515|GO:0005525|GO:0009045	207425_s_at	Hs.440932	10801	NM_006640
SOCS7	suppressor of cytokine signaling 7	2.38106	up	GO:0001558|GO:0006512|GO:0007242|GO:0009968|GO:0005737|GO:0005886|GO:0016020|GO:0005515|GO:0005515|GO:0005515|GO:0017124	214015_at	Hs.632261	30837	AI968839
NFATC2	Nuclear factor of activated T-cells, cytoplasmic, calcineurin-dependent 2	2.36028	down	GO:0006350|GO:0006355|GO:0006355|GO:0045449|GO:0045941|GO:0005634|GO:0005634|GO:0005737|GO:0005737|GO:0003677|GO:0003677|GO:0003700|GO:0003700|GO:0005515|GO:0016563	226991_at	Hs.356321	4773	AA489681
RHOBTB3	Rho-related BTB domain containing 3	2.3564	down	GO:0008104|GO:0005604|GO:0003924|GO:0005515	225202_at	Hs.445030	22836	BE620739
PEX1	peroxisome biogenesis factor 1	2.33839	down	GO:0006625|GO:0006810|GO:0007031|GO:0007031|GO:0015031|GO:0016558|GO:0060152|GO:0005737|GO:0005737|GO:0005777|GO:0005777|GO:0005778|GO:0005778|GO:0005829|GO:0016020|GO:0000166|GO:0005488|GO:0005515|GO:0005515|GO:0005524|GO:0005524|GO:0008022|GO:0017111|GO:0032403|GO:0042623	215023_s_at	Hs.164682	5189	AC000064
KNG1	kininogen 1	2.33777	down	GO:0006939|GO:0006954|GO:0006954|GO:0007162|GO:0007204|GO:0007596|GO:0030146|GO:0030147|GO:0030195|GO:0042311|GO:0043065|GO:0050880|GO:0005576|GO:0005576|GO:0004866|GO:0004869|GO:0005102|GO:0005515|GO:0008201|GO:0008270	217512_at	Hs.77741	3827	BG398937
MAP3K13	Mitogen-activated protein kinase kinase kinase 13	2.32773	down	GO:0000186|GO:0006468|GO:0006468|GO:0007254|GO:0007254|GO:0046777|GO:0051092|GO:0005624|GO:0005737|GO:0008385|GO:0016020|GO:0000166|GO:0000287|GO:0004672|GO:0004674|GO:0004674|GO:0004709|GO:0004709|GO:0004713|GO:0005515|GO:0005524|GO:0016301|GO:0016740|GO:0019901|GO:0042802|GO:0042803|GO:0046872	1562440_at	Hs.656069	9175	BC026249
PTRF	polymerase I and transcript release factor	2.31794	down	GO:0006350|GO:0006353|GO:0006355|GO:0006361|GO:0005634|GO:0005634|GO:0005737|GO:0005737|GO:0005739|GO:0005739|GO:0005783|GO:0005792|GO:0005886|GO:0005901|GO:0016020|GO:0003716|GO:0003716|GO:0003723|GO:0005515|GO:0019843|GO:0042134|GO:0042134	208790_s_at	Hs.437191	284119	AF312393
RIOK3	RIO kinase 3 (yeast)	2.3146	down	GO:0006468|GO:0007059|GO:0000166|GO:0004672|GO:0004674|GO:0005515|GO:0005515|GO:0005524|GO:0016301|GO:0016740	202131_s_at	Hs.709365	8780	NM_003831
JAG1	jagged 1 (Alagille syndrome)	2.3096	up	GO:0001525|GO:0001709|GO:0002011|GO:0007154|GO:0007219|GO:0007219|GO:0007275|GO:0007275|GO:0007399|GO:0009887|GO:0030097|GO:0030216|GO:0030334|GO:0042127|GO:0042491|GO:0045445|GO:0045446|GO:0045596|GO:0045639|GO:0045747|GO:0048839|GO:0005576|GO:0005886|GO:0005887|GO:0016020|GO:0016020|GO:0016021|GO:0005112|GO:0005112|GO:0005198|GO:0005509|GO:0005509|GO:0005515|GO:0008083	216268_s_at	Hs.224012	182	U77914
FST	follistatin	2.30749	up	GO:0000122|GO:0007275|GO:0046882|GO:0051798|GO:0005576|GO:0005576|GO:0005515|GO:0017106	204948_s_at	Hs.9914	10468	NM_013409
XRN1	5'-3' exoribonuclease 1	2.30737	down	GO:0007049|GO:0045786|GO:0005622|GO:0005737|GO:0003676|GO:0003677|GO:0003723|GO:0004518|GO:0004527|GO:0005515|GO:0016787	1555785_a_at	Hs.435103	54464	AY137776
VPS41	vacuolar protein sorting 41 homolog (S. cerevisiae)	2.30518	down	GO:0006810|GO:0006886|GO:0015031|GO:0016192|GO:0005488|GO:0005515|GO:0008270|GO:0046872	235625_at	Hs.592184	27072	AW963328
SUV420H1	suppressor of variegation 4-20 homolog 1 (Drosophila)	2.29753	down	GO:0006350|GO:0006355|GO:0016568|GO:0005634|GO:0005694|GO:0005515|GO:0008168|GO:0016740|GO:0018024	218242_s_at	Hs.632120	51111	NM_017635
AKR1B10	aldo-keto reductase family 1, member B10 (aldose reductase)	2.29459	up	GO:0006081|GO:0007586|GO:0008202|GO:0005737|GO:0004033|GO:0005515|GO:0016491	206561_s_at	Hs.116724	57016	NM_020299
KLHDC5	kelch domain containing 5	2.29377	down	GO:0005515	225961_at	Hs.505104	57542	AI334297
DDX58	DEAD (Asp-Glu-Ala-Asp) box polypeptide 58	2.2927	down	GO:0006955|GO:0009615|GO:0045087|GO:0005737|GO:0000166|GO:0003676|GO:0003723|GO:0004386|GO:0005515|GO:0005524|GO:0008026|GO:0016787|GO:0017111	222793_at	Hs.190622	23586	AK023661
JUN	Jun oncogene	2.27659	up	GO:0006350|GO:0006355|GO:0009987|GO:0031953|GO:0035026|GO:0045449|GO:0045944|GO:0000228|GO:0005634|GO:0005667|GO:0003677|GO:0003677|GO:0003700|GO:0003700|GO:0003702|GO:0005515|GO:0043565|GO:0046983	213281_at	Hs.525704	3725	BE327172
KRIT1	KRIT1, ankyrin repeat containing	2.27213	down	GO:0007264|GO:0005856|GO:0016020|GO:0005083|GO:0005488|GO:0005515	34031_i_at	Hs.531987	889	U90269
ATR	ataxia telangiectasia and Rad3 related	2.27023	down	GO:0000077|GO:0006281|GO:0006281|GO:0006974|GO:0006974|GO:0007049|GO:0007275|GO:0008156|GO:0005634|GO:0005694|GO:0003677|GO:0004672|GO:0004672|GO:0004674|GO:0005488|GO:0005515|GO:0016301|GO:0016740|GO:0016773|GO:0030145|GO:0032405|GO:0032407	209902_at	Hs.271791	545	U49844
SYNE2	spectrin repeat containing, nuclear envelope 2	2.26946	down	GO:0006350|GO:0006355|GO:0006355|GO:0007165|GO:0007267|GO:0030308|GO:0030520|GO:0005634|GO:0005634|GO:0005737|GO:0005739|GO:0016020|GO:0016021|GO:0031965|GO:0003677|GO:0003677|GO:0003700|GO:0003700|GO:0003707|GO:0003707|GO:0003713|GO:0003779|GO:0004872|GO:0004879|GO:0004879|GO:0005198|GO:0005496|GO:0005496|GO:0005515|GO:0008270|GO:0008289|GO:0030284|GO:0043565|GO:0046872|GO:0048019	202761_s_at	Hs.525392	23224	NM_015180
IGF2 /// INS /// INS-IGF2	insulin-like growth factor 2 (somatomedin A) /// insulin /// INS-IGF2	2.26898	down	GO:0001501|GO:0005975|GO:0006006|GO:0006006|GO:0006091|GO:0006349|GO:0006953|GO:0007166|GO:0007267|GO:0007275|GO:0008219|GO:0008283|GO:0008286|GO:0015758|GO:0042177|GO:0045429|GO:0045908|GO:0045909|GO:0046631|GO:0050708|GO:0050715|GO:0051000|GO:0005576|GO:0005576|GO:0005158|GO:0005159|GO:0005179|GO:0005179|GO:0005515|GO:0005520|GO:0005520|GO:0008083|GO:0018445	202410_x_at	Hs.523414	3481 /// 3630 /// 723961	NM_000612
JUN	jun oncogene	2.25105	up	GO:0006350|GO:0006355|GO:0009987|GO:0031953|GO:0035026|GO:0045449|GO:0045944|GO:0000228|GO:0005634|GO:0005667|GO:0003677|GO:0003677|GO:0003700|GO:0003700|GO:0003702|GO:0005515|GO:0043565|GO:0046983	201464_x_at	Hs.525704	3725	BG491844
THRB	thyroid hormone receptor, beta (erythroblastic leukemia viral (v-erb-a) oncogene homolog 2, avian)	2.24229	down	GO:0006350|GO:0006351|GO:0006355|GO:0007605|GO:0005634|GO:0005634|GO:0003677|GO:0003677|GO:0003700|GO:0003700|GO:0003707|GO:0003714|GO:0004872|GO:0004879|GO:0004887|GO:0004887|GO:0005515|GO:0008270|GO:0043565|GO:0046872	229657_at	Hs.187861	7068	BF431989
LCAT	lecithin-cholesterol acyltransferase	2.23122	down	GO:0006629|GO:0006656|GO:0008202|GO:0008203|GO:0008203|GO:0008203|GO:0030301|GO:0042157|GO:0042158|GO:0042158|GO:0042632|GO:0043691|GO:0046688|GO:0051384|GO:0005576|GO:0005615|GO:0003824|GO:0004607|GO:0004607|GO:0004607|GO:0004623|GO:0005515|GO:0008415|GO:0016740	204428_s_at	Hs.387239	3931	NM_000229
INSIG2	insulin induced gene 2	2.23011	up	GO:0006629|GO:0006991|GO:0008202|GO:0008203|GO:0005783|GO:0005789|GO:0016020|GO:0016021|GO:0005515	209566_at	Hs.7089	51141	AL080184
CLUAP1	clusterin associated protein 1	2.2233	down	GO:0005634|GO:0005515	204577_s_at	Hs.155995	23059	NM_024793
PHF12	PHD finger protein 12	2.21515	down	GO:0006350|GO:0006355|GO:0045892|GO:0005634|GO:0005634|GO:0017053|GO:0005515|GO:0005515|GO:0008270|GO:0016564|GO:0046872	231815_at	Hs.444173	57649	AB040956
HNRPDL	heterogeneous nuclear ribonucleoprotein D-like	2.21058	down	GO:0006350|GO:0006355|GO:0006396|GO:0005634|GO:0005634|GO:0005737|GO:0030530|GO:0000166|GO:0003676|GO:0003677|GO:0003690|GO:0003697|GO:0003723|GO:0005515|GO:0008143	209067_s_at	Hs.527105	9987	D89092
IGFBP3	insulin-like growth factor binding protein 3	2.20743	up	GO:0001558|GO:0001933|GO:0006468|GO:0009968|GO:0043065|GO:0045663|GO:0005576|GO:0005576|GO:0005634|GO:0005515|GO:0005520|GO:0005520|GO:0008160|GO:0019838|GO:0046872	210095_s_at	Hs.450230	3486	M31159
WDR19	WD repeat domain 19	2.19502	down	GO:0006886|GO:0016192|GO:0005488|GO:0005515	220917_s_at	Hs.438482	57728	NM_025132
ACTA1	actin, alpha 1, skeletal muscle	2.19381	down	GO:0006936|GO:0030240|GO:0030240|GO:0048741|GO:0001725|GO:0001725|GO:0005737|GO:0005856|GO:0005865|GO:0005865|GO:0005884|GO:0005884|GO:0000166|GO:0005198|GO:0005200|GO:0005515|GO:0005515|GO:0005515|GO:0005524|GO:0005524|GO:0017022|GO:0043531	203872_at	Hs.1288	58	NM_001100
CORO2A	Coronin, actin binding protein, 2A	2.19038	down	GO:0006542|GO:0006807|GO:0007242|GO:0003779|GO:0004356|GO:0005515	227177_at	Hs.113094	7464	AL515381
PKP4	plakophilin 4	2.18377	down	GO:0007155|GO:0007155|GO:0005737|GO:0005856|GO:0005911|GO:0030054|GO:0005198|GO:0005488|GO:0005515	201927_s_at	Hs.407580	8502	BG292559
CALR	calreticulin	2.18068	down	GO:0006355|GO:0006457|GO:0006611|GO:0006874|GO:0030866|GO:0040020|GO:0042981|GO:0005576|GO:0005578|GO:0005615|GO:0005737|GO:0005783|GO:0005783|GO:0005788|GO:0005788|GO:0005829|GO:0009897|GO:0009986|GO:0003677|GO:0005509|GO:0005509|GO:0005515|GO:0005529|GO:0008270|GO:0046872|GO:0051082	214315_x_at	Hs.515162	811	AI348935
SH3RF2	SH3 domain containing ring finger 2	2.17825	down	GO:0006512|GO:0005515|GO:0008270|GO:0016874|GO:0046872	243582_at	Hs.443728	153769	AW082633
SH3BP2	SH3-domain binding protein 2	2.16615	down	GO:0007165|GO:0005070|GO:0005515	217253_at	Hs.167679	6452	L37198
PRKAR1A	protein kinase, cAMP-dependent, regulatory, type I, alpha (tissue specific extinguisher 1)	2.16305	down	GO:0001932|GO:0006357|GO:0006468|GO:0007165|GO:0007242|GO:0005952|GO:0043234|GO:0000166|GO:0005515|GO:0008603|GO:0008603|GO:0016301|GO:0030552	242482_at	Hs.280342	5573	AI682905
CENPE	centromere protein E, 312kDa	2.16161	down	GO:0000089|GO:0007018|GO:0007049|GO:0007067|GO:0007079|GO:0007080|GO:0051301|GO:0051382|GO:0000775|GO:0000775|GO:0000940|GO:0005634|GO:0005634|GO:0005819|GO:0005874|GO:0005875|GO:0000166|GO:0003774|GO:0003777|GO:0003777|GO:0005515|GO:0005524|GO:0043515	205046_at	Hs.75573	1062	NM_001813
MYO1D	myosin ID	2.16111	down	GO:0016459|GO:0000166|GO:0003774|GO:0003779|GO:0005515|GO:0005516|GO:0005524	212338_at	Hs.658000	4642	AA621962
IGF2 /// INS /// INS-IGF2	insulin-like growth factor 2 (somatomedin A) /// insulin /// INS-IGF2	2.15577	down	GO:0001501|GO:0005975|GO:0006006|GO:0006006|GO:0006091|GO:0006349|GO:0006953|GO:0007166|GO:0007267|GO:0007275|GO:0008219|GO:0008283|GO:0008286|GO:0015758|GO:0042177|GO:0045429|GO:0045908|GO:0045909|GO:0046631|GO:0050708|GO:0050715|GO:0051000|GO:0005576|GO:0005576|GO:0005158|GO:0005159|GO:0005179|GO:0005179|GO:0005515|GO:0005520|GO:0005520|GO:0008083|GO:0018445	210881_s_at	Hs.523414	3481 /// 3630 /// 723961	M17863
EPPK1	epiplakin 1	2.15451	down	GO:0005737|GO:0005856|GO:0005856|GO:0005198|GO:0005198|GO:0005515	232165_at	Hs.200412	83481	AL137725
ZBTB20	zinc finger and BTB domain containing 20	2.15388	down	GO:0006350|GO:0006355|GO:0005622|GO:0005634|GO:0003676|GO:0003677|GO:0005515|GO:0008270|GO:0046872	222357_at	Hs.655108	26137	AW974823
ACVR1B	activin A receptor, type IB	2.15335	down	GO:0000082|GO:0001701|GO:0001942|GO:0006468|GO:0006468|GO:0006917|GO:0007165|GO:0007178|GO:0009790|GO:0030308|GO:0032927|GO:0045449|GO:0045648|GO:0005887|GO:0009986|GO:0016020|GO:0016021|GO:0000166|GO:0000287|GO:0004672|GO:0004674|GO:0004674|GO:0004675|GO:0004675|GO:0004872|GO:0005024|GO:0005515|GO:0005524|GO:0005524|GO:0016301|GO:0016361|GO:0016740|GO:0017002|GO:0019838|GO:0030145|GO:0046332|GO:…	208223_s_at	Hs.438918	91	NM_020327
GDF15	growth differentiation factor 15	2.15321	up	GO:0000122|GO:0006333|GO:0006350|GO:0006355|GO:0006412|GO:0006412|GO:0006605|GO:0007165|GO:0007179|GO:0007267|GO:0016568|GO:0016568|GO:0016575|GO:0000118|GO:0000228|GO:0005576|GO:0005576|GO:0005615|GO:0005622|GO:0005634|GO:0005634|GO:0005730|GO:0005737|GO:0005840|GO:0022625|GO:0030529|GO:0003723|GO:0003723|GO:0003735|GO:0003735|GO:0004407|GO:0004407|GO:0005125|GO:0005125|GO:0005515|GO:0008083|GO:…	221577_x_at	Hs.616962	9518	AF003934
USP9X	ubiquitin specific peptidase 9, X-linked	2.14626	down	GO:0006511|GO:0006512|GO:0007292|GO:0004197|GO:0004221|GO:0005515|GO:0008233|GO:0008234|GO:0008234|GO:0016787	201099_at	Hs.77578	8239	AA824386
DCBLD2	discoidin, CUB and LCCL domain containing 2	2.14623	down	GO:0007155|GO:0030308|GO:0030308|GO:0030522|GO:0042060|GO:0042060|GO:0005887|GO:0005887|GO:0009986|GO:0009986|GO:0016020|GO:0016021|GO:0005515	224911_s_at	Hs.203691	131566	AA722799
KLHL13	kelch-like 13 (Drosophila)	2.14542	down	GO:0006512|GO:0005515	227875_at	Hs.348262	90293	AB037730
IL8	interleukin 8	2.14539	up	GO:0001525|GO:0006928|GO:0006935|GO:0006935|GO:0006954|GO:0006954|GO:0006955|GO:0007050|GO:0007155|GO:0007165|GO:0007186|GO:0007242|GO:0007267|GO:0008285|GO:0019722|GO:0030155|GO:0030593|GO:0042119|GO:0045091|GO:0050930|GO:0005576|GO:0005615|GO:0005615|GO:0005125|GO:0005153|GO:0005153|GO:0005515|GO:0008009|GO:0008009	202859_x_at	Hs.551925	3576	NM_000584
GART	phosphoribosylglycinamide formyltransferase, phosphoribosylglycinamide synthetase, phosphoribosylaminoimidazole synthetase	2.1407	down	GO:0006164|GO:0006189|GO:0009058|GO:0009113|GO:0005737|GO:0000166|GO:0003824|GO:0004637|GO:0004641|GO:0004644|GO:0004644|GO:0005515|GO:0005524|GO:0008168|GO:0016740|GO:0016742|GO:0016874|GO:0030145|GO:0046872	212378_at	Hs.473648	2618	NM_000819
SH3BP2	SH3-domain binding protein 2	2.13916	down	GO:0007165|GO:0005070|GO:0005515	217257_at	Hs.167679	6452	L37198
RNF24	ring finger protein 24	2.13811	up	GO:0005515|GO:0008270|GO:0046872	204668_at	Hs.589884	11237	AL031670
JAG1	jagged 1 (Alagille syndrome)	2.13607	up	GO:0001525|GO:0001709|GO:0002011|GO:0007154|GO:0007219|GO:0007219|GO:0007275|GO:0007275|GO:0007399|GO:0009887|GO:0030097|GO:0030216|GO:0030334|GO:0042127|GO:0042491|GO:0045445|GO:0045446|GO:0045596|GO:0045639|GO:0045747|GO:0048839|GO:0005576|GO:0005886|GO:0005887|GO:0016020|GO:0016020|GO:0016021|GO:0005112|GO:0005112|GO:0005198|GO:0005509|GO:0005509|GO:0005515|GO:0008083	209099_x_at	Hs.224012	182	U73936
ATP6V0A1	ATPase, H+ transporting, lysosomal V0 subunit a1	2.13538	down	GO:0006810|GO:0006811|GO:0015992|GO:0016020|GO:0016021|GO:0030659|GO:0031410|GO:0042470|GO:0005515|GO:0015078	212383_at	Hs.463074	535	AL096733
XRN1	5'-3' exoribonuclease 1	2.13059	down	GO:0007049|GO:0045786|GO:0005622|GO:0005737|GO:0003676|GO:0003677|GO:0003723|GO:0004518|GO:0004527|GO:0005515|GO:0016787	233632_s_at	Hs.435103	54464	AL117516
ZFYVE16	zinc finger, FYVE domain containing 16	2.12587	down	GO:0006622|GO:0007165|GO:0016050|GO:0016197|GO:0030100|GO:0005737|GO:0005768|GO:0005769|GO:0016020|GO:0031901|GO:0005515|GO:0005545|GO:0008270|GO:0008565|GO:0046872	203651_at	Hs.482660	9765	NM_014733
A1CF	APOBEC1 complementation factor	2.12534	down	GO:0006397|GO:0050821|GO:0005622|GO:0005634|GO:0005737|GO:0005737|GO:0005783|GO:0030895|GO:0000166|GO:0003676|GO:0003723|GO:0003723|GO:0003725|GO:0003725|GO:0003727|GO:0005515	220951_s_at	Hs.499643	29974	NM_014576
SNX5	sorting nexin 5	2.12309	down	GO:0006810|GO:0007154|GO:0015031|GO:0005515|GO:0035091	229981_at	Hs.316890	27131	AA131508
CBR1	carbonyl reductase 1	2.12155	up	GO:0008152|GO:0005737|GO:0005829|GO:0003824|GO:0004090|GO:0004090|GO:0005488|GO:0005515|GO:0016491|GO:0047021|GO:0050221	209213_at	Hs.88778	873	BC002511
HIP1	Huntingtin interacting protein 1	2.11642	down	GO:0006897|GO:0006915|GO:0006919|GO:0042981|GO:0048268|GO:0005624|GO:0005737|GO:0005737|GO:0005794|GO:0005856|GO:0012505|GO:0016020|GO:0003779|GO:0005200|GO:0005488|GO:0005515|GO:0005543|GO:0030276	226364_at	Hs.329266	3092	AU145049
2009-09-11	septin 11	2.11134	down	GO:0007049|GO:0051291|GO:0051301|GO:0001725|GO:0031105|GO:0000166|GO:0005515|GO:0005515|GO:0005525	230071_at	Hs.128199	55752	AI333326
HNRNPD	heterogeneous nuclear ribonucleoprotein D (AU-rich element RNA binding protein 1, 37kDa)	2.10298	down	GO:0006350|GO:0006355|GO:0006355|GO:0006396|GO:0006401|GO:0000781|GO:0005634|GO:0005634|GO:0005634|GO:0005694|GO:0030529|GO:0030530|GO:0000166|GO:0003676|GO:0003677|GO:0003723|GO:0003723|GO:0003723|GO:0005515|GO:0016563	209330_s_at	Hs.480073	3184	D55674
PKP2	plakophilin 2	2.10267	down	GO:0007155|GO:0016337|GO:0005634|GO:0005634|GO:0005737|GO:0005856|GO:0005886|GO:0005911|GO:0016021|GO:0030054|GO:0030057|GO:0005198|GO:0005488|GO:0005515	207717_s_at	Hs.164384	5318	NM_004572
ATRX	alpha thalassemia/mental retardation syndrome X-linked (RAD54 homolog, S. cerevisiae)	2.10018	down	GO:0006281|GO:0006281|GO:0006306|GO:0006310|GO:0006355|GO:0006974|GO:0007605|GO:0005634|GO:0005634|GO:0005720|GO:0000166|GO:0003676|GO:0003677|GO:0003678|GO:0003700|GO:0004386|GO:0004386|GO:0005515|GO:0005515|GO:0005524|GO:0008270|GO:0016787|GO:0046872	208859_s_at	Hs.533526	546	AI650257
PARD3	par-3 partitioning defective 3 homolog (C. elegans)	2.097	down	GO:0006461|GO:0007049|GO:0007163|GO:0007205|GO:0007409|GO:0008356|GO:0051301|GO:0005886|GO:0005923|GO:0005923|GO:0005923|GO:0005923|GO:0012505|GO:0016020|GO:0030054|GO:0005515|GO:0005515|GO:0005515	221527_s_at	Hs.131489	56288	AF196185
SMARCA4	SWI/SNF related, matrix associated, actin dependent regulator of chromatin, subfamily a, member 4	2.09605	down	GO:0000122|GO:0001832|GO:0001835|GO:0006346|GO:0006350|GO:0006355|GO:0006357|GO:0007403|GO:0030900|GO:0030902|GO:0000792|GO:0005634|GO:0005634|GO:0005654|GO:0000166|GO:0003676|GO:0003677|GO:0003682|GO:0003700|GO:0003713|GO:0004386|GO:0004386|GO:0005515|GO:0005524|GO:0008134|GO:0016787|GO:0042802|GO:0047485	212520_s_at	Hs.327527	6597	AI684141
CNOT3	CCR4-NOT transcription complex, subunit 3	2.09563	down	GO:0006350|GO:0006355|GO:0045449|GO:0005634|GO:0005737|GO:0005515|GO:0030528	229143_at	Hs.343571	4849	AW449353
PLAUR	plasminogen activator, urokinase receptor	2.09486	up	GO:0006928|GO:0006935|GO:0007165|GO:0007166|GO:0007596|GO:0007596|GO:0030162|GO:0005576|GO:0005886|GO:0005886|GO:0009986|GO:0016020|GO:0016021|GO:0019898|GO:0031225|GO:0004872|GO:0004872|GO:0004872|GO:0005515|GO:0016301|GO:0019899|GO:0030377|GO:0030377	210845_s_at	Hs.466871	5329	U08839
RIOK3	RIO kinase 3 (yeast)	2.09394	down	GO:0006468|GO:0007059|GO:0000166|GO:0004672|GO:0004674|GO:0005515|GO:0005515|GO:0005524|GO:0016301|GO:0016740	202130_at	Hs.709365	8780	AA725102
LRBA	LPS-responsive vesicle trafficking, beach and anchor containing	2.08856	down	GO:0005488|GO:0005515	212692_s_at	Hs.480938	987	W60686
BNIP3L	BCL2/adenovirus E1B 19kDa interacting protein 3-like	2.08461	up	GO:0006915|GO:0006917|GO:0008634|GO:0043065|GO:0043066|GO:0051607|GO:0005634|GO:0005635|GO:0005635|GO:0005739|GO:0005739|GO:0005740|GO:0005783|GO:0005783|GO:0016020|GO:0016021|GO:0031224|GO:0005515|GO:0005521|GO:0042802|GO:0042803|GO:0046982	221479_s_at	Hs.131226	665	AF060922
VDR	vitamin D (1,25- dihydroxyvitamin D3) receptor	2.08164	down	GO:0001501|GO:0006350|GO:0006355|GO:0006816|GO:0006874|GO:0007165|GO:0007275|GO:0009887|GO:0016481|GO:0050892|GO:0005634|GO:0003677|GO:0003677|GO:0003677|GO:0003700|GO:0003707|GO:0004872|GO:0004879|GO:0005515|GO:0005515|GO:0008270|GO:0008434|GO:0043565|GO:0046872	204255_s_at	Hs.524368	7421	AA772285
ANKRA2	ankyrin repeat, family A (RFXANK-like), 2	2.08155	down	GO:0005624|GO:0005737|GO:0005829|GO:0005856|GO:0016020|GO:0016020|GO:0005515|GO:0030169	218769_s_at	Hs.239154	57763	NM_023039
SQSTM1	sequestosome 1	2.07855	up	GO:0006511|GO:0006915|GO:0006950|GO:0006955|GO:0007242|GO:0008104|GO:0016197|GO:0030154|GO:0043122|GO:0043122|GO:0045944|GO:0005634|GO:0005737|GO:0005768|GO:0005770|GO:0005829|GO:0005829|GO:0005515|GO:0005515|GO:0008270|GO:0019901|GO:0019901|GO:0030971|GO:0042169|GO:0042169|GO:0043130|GO:0043130|GO:0046872	201471_s_at	Hs.437277	8878	NM_003900
RHOBTB3	Rho-related BTB domain containing 3	2.07601	down	GO:0008104|GO:0005604|GO:0003924|GO:0005515	202976_s_at	Hs.445030	22836	NM_014899
DENND4A	DENN/MADD domain containing 4A	2.07362	down	GO:0006350|GO:0006355|GO:0006355|GO:0005634|GO:0005634|GO:0003677|GO:0003677|GO:0005515	214787_at	Hs.654567	10260	BE268538
RGS3	regulator of G-protein signaling 3	2.07032	up	GO:0000188|GO:0008277|GO:0009968|GO:0005634|GO:0005737|GO:0005829|GO:0016020|GO:0004871|GO:0005096|GO:0005515	220300_at	Hs.494875	5998	NM_017790
RORA	RAR-related orphan receptor A	2.06911	up	GO:0006350|GO:0006355|GO:0007165|GO:0045944|GO:0005634|GO:0003677|GO:0003700|GO:0003700|GO:0003707|GO:0004872|GO:0004879|GO:0004879|GO:0005515|GO:0008270|GO:0043565|GO:0046872	210479_s_at	Hs.695914	6095	L14611
KIAA1333	KIAA1333	2.06641	down	GO:0006464|GO:0006512|GO:0005622|GO:0005634|GO:0005737|GO:0004842|GO:0005515|GO:0005515|GO:0008270|GO:0016874|GO:0046872	223254_s_at	Hs.509008	55632	AA887053
ANAPC7	anaphase promoting complex subunit 7	2.06638	down	GO:0006512|GO:0007049|GO:0007067|GO:0051301|GO:0005680|GO:0005488|GO:0005515	225521_at	Hs.529280	51434	AL137586
ARID1A	AT rich interactive domain 1A (SWI-like)	2.06543	down	GO:0006350|GO:0006355|GO:0016568|GO:0030520|GO:0030521|GO:0042766|GO:0042921|GO:0048096|GO:0005622|GO:0005634|GO:0005634|GO:0016514|GO:0003677|GO:0003677|GO:0003677|GO:0005515|GO:0005515|GO:0016563	210649_s_at	Hs.468972	8289	AF231056
FLRT2	fibronectin leucine rich transmembrane protein 2	2.06327	down	GO:0007155|GO:0005578|GO:0005887|GO:0016020|GO:0016021|GO:0005057|GO:0005515|GO:0030674	204359_at	Hs.533710	23768	NM_013231
IGF2BP2	insulin-like growth factor 2 mRNA binding protein 2	2.05859	down	GO:0006412|GO:0006412|GO:0006412|GO:0006417|GO:0009653|GO:0017148|GO:0042035|GO:0005622|GO:0005634|GO:0005737|GO:0005737|GO:0005840|GO:0015935|GO:0015935|GO:0022627|GO:0030529|GO:0044430|GO:0000166|GO:0003676|GO:0003723|GO:0003723|GO:0003735|GO:0003735|GO:0003735|GO:0005515|GO:0019843|GO:0045182|GO:0048027	223963_s_at	Hs.35354	10644	AF117107
KLF5	Kruppel-like factor 5 (intestinal)	2.05755	up	GO:0001525|GO:0006350|GO:0006355|GO:0006366|GO:0008284|GO:0030033|GO:0045941|GO:0005622|GO:0005634|GO:0003676|GO:0003677|GO:0003700|GO:0003702|GO:0005515|GO:0008270|GO:0046872	209211_at	Hs.508234	688	AF132818
FGD4	FYVE, RhoGEF and PH domain containing 4	2.05712	down	GO:0007010|GO:0008360|GO:0030036|GO:0035023|GO:0043088|GO:0046847|GO:0001726|GO:0005622|GO:0005737|GO:0005737|GO:0005794|GO:0005856|GO:0030027|GO:0042995|GO:0003779|GO:0005085|GO:0005085|GO:0005089|GO:0005515|GO:0008270|GO:0031267|GO:0046872	230559_x_at	Hs.117835	121512	AI277617
LRBA	LPS-responsive vesicle trafficking, beach and anchor containing	2.05645	down	GO:0005488|GO:0005515	214109_at	Hs.480938	987	AI659561
MAP3K8	mitogen-activated protein kinase kinase kinase 8	2.05611	down	GO:0006468|GO:0006468|GO:0005737|GO:0005829|GO:0000166|GO:0000287|GO:0004672|GO:0004674|GO:0004674|GO:0004709|GO:0005515|GO:0005524|GO:0016301|GO:0016740|GO:0046872	205027_s_at	Hs.432453	1326	NM_005204
HSPG2	heparan sulfate proteoglycan 2	2.04982	down	GO:0007155|GO:0005576|GO:0005578|GO:0005604|GO:0005615|GO:0031012|GO:0005515	201654_s_at	Hs.707982	3339	AI991033
FOS	v-fos FBJ murine osteosarcoma viral oncogene homolog	2.04645	up	GO:0006306|GO:0006355|GO:0006357|GO:0006954|GO:0007399|GO:0045449|GO:0005634|GO:0005634|GO:0005667|GO:0003677|GO:0003690|GO:0003700|GO:0003704|GO:0005515|GO:0043565|GO:0046982|GO:0046983	209189_at	Hs.25647	2353	BC004490
PRLR	Prolactin receptor	2.04643	down	GO:0006694|GO:0006916|GO:0007166|GO:0007171|GO:0007566|GO:0007595|GO:0007595|GO:0042110|GO:0042977|GO:0005576|GO:0009986|GO:0016020|GO:0016021|GO:0004872|GO:0004896|GO:0004925|GO:0004925|GO:0005515|GO:0042803|GO:0042978	227629_at	Hs.368587	5618	AA843963
2009-09-06	septin 6	2.04565	down	GO:0000910|GO:0007049|GO:0051301|GO:0031105|GO:0000166|GO:0005515|GO:0005515|GO:0005515|GO:0005525|GO:0005525	212413_at	Hs.496666	23157	D50918
INPP5D	inositol polyphosphate-5-phosphatase, 145kDa	2.04142	down	GO:0006796|GO:0006915|GO:0006955|GO:0007165|GO:0005737|GO:0016020|GO:0004437|GO:0004445|GO:0005515|GO:0005515|GO:0016787|GO:0016791	203331_s_at	Hs.262886	3635	U53470
TNS1	tensin 1	2.04098	up	GO:0005737|GO:0005856|GO:0030054|GO:0003779|GO:0005515	218864_at	Hs.471381	7145	AF116610
IFNAR1	interferon (alpha, beta and omega) receptor 1	2.03991	down	GO:0007166|GO:0007259|GO:0009615|GO:0045351|GO:0005887|GO:0016020|GO:0016021|GO:0004872|GO:0004904|GO:0004905|GO:0005515	225669_at	Hs.529400	3454	AA133989
PKP4	plakophilin 4	2.03987	down	GO:0007155|GO:0007155|GO:0005737|GO:0005856|GO:0005911|GO:0030054|GO:0005198|GO:0005488|GO:0005515	201929_s_at	Hs.407580	8502	NM_003628
SMC4	structural maintenance of chromosomes 4	2.02908	down	GO:0000070|GO:0006259|GO:0007049|GO:0007067|GO:0007076|GO:0007076|GO:0051276|GO:0051301|GO:0000796|GO:0005634|GO:0005634|GO:0005694|GO:0005737|GO:0000166|GO:0005515|GO:0005524|GO:0005524|GO:0046982	215623_x_at	Hs.58992	10051	AK002200
RCOR3	REST corepressor 3	2.02877	up	GO:0006350|GO:0006355|GO:0005634|GO:0003677|GO:0005515	218344_s_at	Hs.696152	55758	NM_018254
NF1	neurofibromin 1 (neurofibromatosis, von Recklinghausen disease, Watson disease)	2.02627	down	GO:0000165|GO:0001649|GO:0001656|GO:0001666|GO:0001889|GO:0001937|GO:0001952|GO:0006469|GO:0007049|GO:0007154|GO:0007165|GO:0007265|GO:0007406|GO:0007420|GO:0007422|GO:0007507|GO:0008542|GO:0014044|GO:0014065|GO:0021510|GO:0021897|GO:0021987|GO:0022011|GO:0030036|GO:0030198|GO:0030199|GO:0030325|GO:0030336|GO:0032318|GO:0032320|GO:0032320|GO:0042060|GO:0042992|GO:0043065|GO:0043407|GO:0043409|GO:…	212678_at	Hs.113577	4763	AW054826
C9orf86	chromosome 9 open reading frame 86	2.0236	down	GO:0007264|GO:0005622|GO:0005634|GO:0005737|GO:0000166|GO:0005515|GO:0005525	225377_at	Hs.567803	55684	BE783949
TRIM73	tripartite motif-containing 73	2.02186	down	GO:0005622|GO:0005515|GO:0008270|GO:0046872	1554250_s_at	Hs.661254	375593	BC033812
ALB	albumin	2.01359	down	GO:0006810|GO:0006810|GO:0009267|GO:0019836|GO:0043066|GO:0043072|GO:0051659|GO:0005576|GO:0005576|GO:0005615|GO:0043234|GO:0003677|GO:0005504|GO:0005504|GO:0005507|GO:0005507|GO:0005515|GO:0008144|GO:0008144|GO:0008289|GO:0015643|GO:0016209|GO:0019825|GO:0030170|GO:0046872	211298_s_at	Hs.418167	213	AF116645
BAZ2B	bromodomain adjacent to zinc finger domain, 2B	2.00797	down	GO:0006350|GO:0006355|GO:0005634|GO:0003677|GO:0005515|GO:0008270|GO:0046872	203080_s_at	Hs.470369	29994	NM_013450
KLHDC2	kelch domain containing 2	2.00501	down	GO:0005634|GO:0005515|GO:0005515	217906_at	Hs.509264	23588	NM_014315
PPP2R1B	protein phosphatase 2 (formerly 2A), regulatory subunit A, beta isoform	2.00284	down	GO:0003823|GO:0004722|GO:0005488|GO:0005515|GO:0005515|GO:0046982	202883_s_at	Hs.584790	5519	T79584
kinase	GO number :	0016301	Percentage of the total number of genes :			0.0339
Gene Symbol	Gene Title	Fold change([Myr] vs [CTL])	Regulation ([Myr] vs [CTL])	GO(Avadis)	Probe Set ID	Unigene (Avadis)	Entrez Gene	Representative Public ID
FGFR3	fibroblast growth factor receptor 3 (achondroplasia, thanatophoric dwarfism)	2.97995	down	GO:0000165|GO:0001501|GO:0006468|GO:0007259|GO:0007605|GO:0008543|GO:0016049|GO:0005887|GO:0016020|GO:0016021|GO:0016021|GO:0000166|GO:0004672|GO:0004713|GO:0004714|GO:0004872|GO:0005007|GO:0005007|GO:0005515|GO:0005524|GO:0016301|GO:0016740|GO:0042802	204380_s_at	Hs.1420	2261	M58051
ATR	ataxia telangiectasia and Rad3 related	2.76053	down	GO:0000077|GO:0006281|GO:0006281|GO:0006974|GO:0006974|GO:0007049|GO:0007275|GO:0008156|GO:0005634|GO:0005694|GO:0003677|GO:0004672|GO:0004672|GO:0004674|GO:0005488|GO:0005515|GO:0016301|GO:0016740|GO:0016773|GO:0030145|GO:0032405|GO:0032407	209903_s_at	Hs.271791	545	U49844
PFKFB3	6-phosphofructo-2-kinase/fructose-2,6-biphosphatase 3	2.46297	up	GO:0006003|GO:0006003|GO:0008152|GO:0000166|GO:0003824|GO:0003873|GO:0003873|GO:0004331|GO:0004331|GO:0005515|GO:0005524|GO:0016301|GO:0016740|GO:0016787|GO:0042802	202464_s_at	Hs.195471	5209	NM_004566
PFKFB4	6-phosphofructo-2-kinase/fructose-2,6-biphosphatase 4	2.44094	up	GO:0006003|GO:0006003|GO:0008152|GO:0000166|GO:0003824|GO:0003873|GO:0003873|GO:0004331|GO:0005524|GO:0016301|GO:0016740|GO:0016787	228499_at	Hs.476217	5210	AL038787
VRK1	vaccinia related kinase 1	2.39608	down	GO:0006468|GO:0006468|GO:0005634|GO:0000166|GO:0004672|GO:0004674|GO:0004674|GO:0005524|GO:0016301|GO:0016740	203856_at	Hs.422662	7443	NM_003384
MAP3K13	Mitogen-activated protein kinase kinase kinase 13	2.32773	down	GO:0000186|GO:0006468|GO:0006468|GO:0007254|GO:0007254|GO:0046777|GO:0051092|GO:0005624|GO:0005737|GO:0008385|GO:0016020|GO:0000166|GO:0000287|GO:0004672|GO:0004674|GO:0004674|GO:0004709|GO:0004709|GO:0004713|GO:0005515|GO:0005524|GO:0016301|GO:0016740|GO:0019901|GO:0042802|GO:0042803|GO:0046872	1562440_at	Hs.656069	9175	BC026249
RIOK3	RIO kinase 3 (yeast)	2.3146	down	GO:0006468|GO:0007059|GO:0000166|GO:0004672|GO:0004674|GO:0005515|GO:0005515|GO:0005524|GO:0016301|GO:0016740	202131_s_at	Hs.709365	8780	NM_003831
PDK1	pyruvate dehydrogenase kinase, isozyme 1	2.3081	up	GO:0005975|GO:0006006|GO:0006006|GO:0007165|GO:0007264|GO:0018106|GO:0005739|GO:0005739|GO:0005759|GO:0000155|GO:0004672|GO:0004673|GO:0004740|GO:0004740|GO:0005524|GO:0016301|GO:0016740	206686_at	Hs.470633	5163	NM_002610
ATR	ataxia telangiectasia and Rad3 related	2.27023	down	GO:0000077|GO:0006281|GO:0006281|GO:0006974|GO:0006974|GO:0007049|GO:0007275|GO:0008156|GO:0005634|GO:0005694|GO:0003677|GO:0004672|GO:0004672|GO:0004674|GO:0005488|GO:0005515|GO:0016301|GO:0016740|GO:0016773|GO:0030145|GO:0032405|GO:0032407	209902_at	Hs.271791	545	U49844
ETNK1	ethanolamine kinase 1	2.25825	up	GO:0006646|GO:0005737|GO:0005737|GO:0004305|GO:0004305|GO:0016301|GO:0016740	224454_at	Hs.29464	55500	BC006111
HISPPD1	histidine acid phosphatase domain containing 1	2.19362	down	GO:0006020|GO:0005737|GO:0005829|GO:0000827|GO:0000832|GO:0003993|GO:0016301|GO:0016740|GO:0033857|GO:0033857	203253_s_at	Hs.212046	23262	NM_015216
MINK1	misshapen-like kinase 1 (zebrafish)	2.18733	down	GO:0006468|GO:0006468|GO:0006950|GO:0007243|GO:0007254|GO:0007275|GO:0000166|GO:0004672|GO:0004672|GO:0004674|GO:0004674|GO:0005083|GO:0005524|GO:0005524|GO:0016301|GO:0016740	214246_x_at	Hs.443417	50488	AI859060
PRKAR1A	protein kinase, cAMP-dependent, regulatory, type I, alpha (tissue specific extinguisher 1)	2.16305	down	GO:0001932|GO:0006357|GO:0006468|GO:0007165|GO:0007242|GO:0005952|GO:0043234|GO:0000166|GO:0005515|GO:0008603|GO:0008603|GO:0016301|GO:0030552	242482_at	Hs.280342	5573	AI682905
LMTK3	lemur tyrosine kinase 3	2.15798	down	GO:0006468|GO:0016020|GO:0016021|GO:0000166|GO:0004672|GO:0004674|GO:0004713|GO:0005524|GO:0016301|GO:0016740	1557103_a_at	Hs.207426	114783	BE868592
ACVR1B	activin A receptor, type IB	2.15335	down	GO:0000082|GO:0001701|GO:0001942|GO:0006468|GO:0006468|GO:0006917|GO:0007165|GO:0007178|GO:0009790|GO:0030308|GO:0032927|GO:0045449|GO:0045648|GO:0005887|GO:0009986|GO:0016020|GO:0016021|GO:0000166|GO:0000287|GO:0004672|GO:0004674|GO:0004674|GO:0004675|GO:0004675|GO:0004872|GO:0005024|GO:0005515|GO:0005524|GO:0005524|GO:0016301|GO:0016361|GO:0016740|GO:0017002|GO:0019838|GO:0030145|GO:0046332|GO:…	208223_s_at	Hs.438918	91	NM_020327
MYLK	myosin light chain kinase	2.10908	down	GO:0006468|GO:0006468|GO:0000166|GO:0000287|GO:0004672|GO:0004674|GO:0004687|GO:0004687|GO:0004871|GO:0005509|GO:0005516|GO:0005524|GO:0016301|GO:0016740|GO:0046872	224823_at	Hs.556600	4638	AA526844
BUB1	BUB1 budding uninhibited by benzimidazoles 1 homolog (yeast)	2.09572	down	GO:0006468|GO:0007049|GO:0007067|GO:0007093|GO:0007094|GO:0008283|GO:0051301|GO:0000776|GO:0000776|GO:0005634|GO:0005816|GO:0000166|GO:0004672|GO:0004672|GO:0004674|GO:0005524|GO:0016301|GO:0016740	209642_at	Hs.469649	699	AF043294
PLAUR	plasminogen activator, urokinase receptor	2.09486	up	GO:0006928|GO:0006935|GO:0007165|GO:0007166|GO:0007596|GO:0007596|GO:0030162|GO:0005576|GO:0005886|GO:0005886|GO:0009986|GO:0016020|GO:0016021|GO:0019898|GO:0031225|GO:0004872|GO:0004872|GO:0004872|GO:0005515|GO:0016301|GO:0019899|GO:0030377|GO:0030377	210845_s_at	Hs.466871	5329	U08839
RIOK3	RIO kinase 3 (yeast)	2.09394	down	GO:0006468|GO:0007059|GO:0000166|GO:0004672|GO:0004674|GO:0005515|GO:0005515|GO:0005524|GO:0016301|GO:0016740	202130_at	Hs.709365	8780	AA725102
DDR2	discoidin domain receptor tyrosine kinase 2	2.06554	down	GO:0006468|GO:0007155|GO:0007155|GO:0007165|GO:0007169|GO:0008284|GO:0005887|GO:0016020|GO:0000166|GO:0004713|GO:0004714|GO:0004714|GO:0004872|GO:0005524|GO:0016301|GO:0016740	227561_at	Hs.591469	4921	W73819
MAP3K8	mitogen-activated protein kinase kinase kinase 8	2.05611	down	GO:0006468|GO:0006468|GO:0005737|GO:0005829|GO:0000166|GO:0000287|GO:0004672|GO:0004674|GO:0004674|GO:0004709|GO:0005515|GO:0005524|GO:0016301|GO:0016740|GO:0046872	205027_s_at	Hs.432453	1326	NM_005204
protein kinase activity		GO number :	0004672	Percentage of the total number of genes :			0.0226
Gene Symbol	Gene Title	Fold change([Myr] vs [CTL])	Regulation ([Myr] vs [CTL])	GO(Avadis)	Probe Set ID	Unigene (Avadis)	Entrez Gene	Representative Public ID
FGFR3	fibroblast growth factor receptor 3 (achondroplasia, thanatophoric dwarfism)	2.97995	down	GO:0000165|GO:0001501|GO:0006468|GO:0007259|GO:0007605|GO:0008543|GO:0016049|GO:0005887|GO:0016020|GO:0016021|GO:0016021|GO:0000166|GO:0004672|GO:0004713|GO:0004714|GO:0004872|GO:0005007|GO:0005007|GO:0005515|GO:0005524|GO:0016301|GO:0016740|GO:0042802	204380_s_at	Hs.1420	2261	M58051
ATR	ataxia telangiectasia and Rad3 related	2.76053	down	GO:0000077|GO:0006281|GO:0006281|GO:0006974|GO:0006974|GO:0007049|GO:0007275|GO:0008156|GO:0005634|GO:0005694|GO:0003677|GO:0004672|GO:0004672|GO:0004674|GO:0005488|GO:0005515|GO:0016301|GO:0016740|GO:0016773|GO:0030145|GO:0032405|GO:0032407	209903_s_at	Hs.271791	545	U49844
VRK1	vaccinia related kinase 1	2.39608	down	GO:0006468|GO:0006468|GO:0005634|GO:0000166|GO:0004672|GO:0004674|GO:0004674|GO:0005524|GO:0016301|GO:0016740	203856_at	Hs.422662	7443	NM_003384
MAP3K13	Mitogen-activated protein kinase kinase kinase 13	2.32773	down	GO:0000186|GO:0006468|GO:0006468|GO:0007254|GO:0007254|GO:0046777|GO:0051092|GO:0005624|GO:0005737|GO:0008385|GO:0016020|GO:0000166|GO:0000287|GO:0004672|GO:0004674|GO:0004674|GO:0004709|GO:0004709|GO:0004713|GO:0005515|GO:0005524|GO:0016301|GO:0016740|GO:0019901|GO:0042802|GO:0042803|GO:0046872	1562440_at	Hs.656069	9175	BC026249
RIOK3	RIO kinase 3 (yeast)	2.3146	down	GO:0006468|GO:0007059|GO:0000166|GO:0004672|GO:0004674|GO:0005515|GO:0005515|GO:0005524|GO:0016301|GO:0016740	202131_s_at	Hs.709365	8780	NM_003831
PDK1	pyruvate dehydrogenase kinase, isozyme 1	2.3081	up	GO:0005975|GO:0006006|GO:0006006|GO:0007165|GO:0007264|GO:0018106|GO:0005739|GO:0005739|GO:0005759|GO:0000155|GO:0004672|GO:0004673|GO:0004740|GO:0004740|GO:0005524|GO:0016301|GO:0016740	206686_at	Hs.470633	5163	NM_002610
ATR	ataxia telangiectasia and Rad3 related	2.27023	down	GO:0000077|GO:0006281|GO:0006281|GO:0006974|GO:0006974|GO:0007049|GO:0007275|GO:0008156|GO:0005634|GO:0005694|GO:0003677|GO:0004672|GO:0004672|GO:0004674|GO:0005488|GO:0005515|GO:0016301|GO:0016740|GO:0016773|GO:0030145|GO:0032405|GO:0032407	209902_at	Hs.271791	545	U49844
MINK1	misshapen-like kinase 1 (zebrafish)	2.18733	down	GO:0006468|GO:0006468|GO:0006950|GO:0007243|GO:0007254|GO:0007275|GO:0000166|GO:0004672|GO:0004672|GO:0004674|GO:0004674|GO:0005083|GO:0005524|GO:0005524|GO:0016301|GO:0016740	214246_x_at	Hs.443417	50488	AI859060
LMTK3	lemur tyrosine kinase 3	2.15798	down	GO:0006468|GO:0016020|GO:0016021|GO:0000166|GO:0004672|GO:0004674|GO:0004713|GO:0005524|GO:0016301|GO:0016740	1557103_a_at	Hs.207426	114783	BE868592
ACVR1B	activin A receptor, type IB	2.15335	down	GO:0000082|GO:0001701|GO:0001942|GO:0006468|GO:0006468|GO:0006917|GO:0007165|GO:0007178|GO:0009790|GO:0030308|GO:0032927|GO:0045449|GO:0045648|GO:0005887|GO:0009986|GO:0016020|GO:0016021|GO:0000166|GO:0000287|GO:0004672|GO:0004674|GO:0004674|GO:0004675|GO:0004675|GO:0004872|GO:0005024|GO:0005515|GO:0005524|GO:0005524|GO:0016301|GO:0016361|GO:0016740|GO:0017002|GO:0019838|GO:0030145|GO:0046332|GO:…	208223_s_at	Hs.438918	91	NM_020327
MYLK	myosin light chain kinase	2.10908	down	GO:0006468|GO:0006468|GO:0000166|GO:0000287|GO:0004672|GO:0004674|GO:0004687|GO:0004687|GO:0004871|GO:0005509|GO:0005516|GO:0005524|GO:0016301|GO:0016740|GO:0046872	224823_at	Hs.556600	4638	AA526844
BUB1	BUB1 budding uninhibited by benzimidazoles 1 homolog (yeast)	2.09572	down	GO:0006468|GO:0007049|GO:0007067|GO:0007093|GO:0007094|GO:0008283|GO:0051301|GO:0000776|GO:0000776|GO:0005634|GO:0005816|GO:0000166|GO:0004672|GO:0004672|GO:0004674|GO:0005524|GO:0016301|GO:0016740	209642_at	Hs.469649	699	AF043294
RIOK3	RIO kinase 3 (yeast)	2.09394	down	GO:0006468|GO:0007059|GO:0000166|GO:0004672|GO:0004674|GO:0005515|GO:0005515|GO:0005524|GO:0016301|GO:0016740	202130_at	Hs.709365	8780	AA725102
MAP3K8	mitogen-activated protein kinase kinase kinase 8	2.05611	down	GO:0006468|GO:0006468|GO:0005737|GO:0005829|GO:0000166|GO:0000287|GO:0004672|GO:0004674|GO:0004674|GO:0004709|GO:0005515|GO:0005524|GO:0016301|GO:0016740|GO:0046872	205027_s_at	Hs.432453	1326	NM_005204
